# Supplementary material for: Vaccine-Related Autoimmune Hepatitis: Emerging Association with SARS-CoV-2 Vaccination or Coincidence?
Source: MDPI journal article supplement (doi:10.3390/vaccines10122073), 2022-12-04
Supplement: s1 [file s1]

### Simplified Diagnostic Criteria for Autoimmune Hepatitis (AIH)

Probability  
Definite AIH:  $\geq 7$   
Probable AIH:  $\geq 6$

(Hennes EM, Zeniya M, Czaja AJ, Pares A, Dalekos GN, Krawitt EL, et. Simplified criteria for the diagnosis of autoimmune hepatitis. *Hepatology*. 2008; 48(1):169-76)

| Variable                                                                                                                                                                                                                                           | Cutoff                         | Points | Case by <b>Barary et al</b><br>(Points) | Total score                        |
|----------------------------------------------------------------------------------------------------------------------------------------------------------------------------------------------------------------------------------------------------|--------------------------------|--------|-----------------------------------------|------------------------------------|
| ANA or SMA                                                                                                                                                                                                                                         | ≥1:40                          | 1      | 0                                       | Score: 2<br><br>➔ Non-probable AIH |
| ANA or SMA                                                                                                                                                                                                                                         | ≥1:80                          | 2      | 0                                       |                                    |
| or LKM                                                                                                                                                                                                                                             | ≥1:40                          |        |                                         |                                    |
| or SLA                                                                                                                                                                                                                                             | Positive                       |        |                                         |                                    |
| IgG                                                                                                                                                                                                                                                | >Upper normal limit            | 1      | 0                                       |                                    |
|                                                                                                                                                                                                                                                    | >1.10 times upper normal limit | 2      |                                         |                                    |
| Liver histology (evidence of hepatitis is a necessary condition)                                                                                                                                                                                   | Compatible with AIH            | 1      | 0                                       |                                    |
|                                                                                                                                                                                                                                                    | Typical AIH                    | 2      |                                         |                                    |
| Absence of viral hepatitis                                                                                                                                                                                                                         | Yes                            | 2      | 2                                       |                                    |
| AIH: Autoimmune hepatitis; ANA: antinuclear antibodies; LKM: liver-kidney microsomal antibodies; SLA: soluble liver antigen antibodies; SMA: smooth muscle antibodies;<br>*Addition of points achieved for all autoantibodies (maximum, 2 points). |                                |        |                                         |                                    |

| Variable                                                                                                                                                                                                                                           | Cutoff                         | Points | Case by <b>Mekrithikrai et al</b> (Points) | Total score                                  |
|----------------------------------------------------------------------------------------------------------------------------------------------------------------------------------------------------------------------------------------------------|--------------------------------|--------|--------------------------------------------|----------------------------------------------|
| <b>ANA or SMA</b>                                                                                                                                                                                                                                  | ≥1:40                          | 1      | 1                                          | <b>Score: 8</b><br><br>➔ <b>Definite AIH</b> |
| <b>ANA or SMA</b>                                                                                                                                                                                                                                  | ≥1:80                          | 2      | 2                                          |                                              |
| <b>or LKM</b>                                                                                                                                                                                                                                      | ≥1:40                          |        |                                            |                                              |
| <b>or SLA</b>                                                                                                                                                                                                                                      | Positive                       |        |                                            |                                              |
| <b>IgG</b>                                                                                                                                                                                                                                         | >Upper normal limit            | 1      | 1                                          |                                              |
|                                                                                                                                                                                                                                                    | >1.10 times upper normal limit | 2      |                                            |                                              |
| <b>Liver histology</b> (evidence of hepatitis is a necessary condition)                                                                                                                                                                            | Compatible with AIH            | 1      | 2                                          |                                              |
|                                                                                                                                                                                                                                                    | Typical AIH                    | 2      |                                            |                                              |
| <b>Absence of viral hepatitis</b>                                                                                                                                                                                                                  | Yes                            | 2      | 2                                          |                                              |
| AIH: Autoimmune hepatitis; ANA: antinuclear antibodies; LKM: liver-kidney microsomal antibodies; SLA: soluble liver antigen antibodies; SMA: smooth muscle antibodies;<br>*Addition of points achieved for all autoantibodies (maximum, 2 points). |                                |        |                                            |                                              |

| Variable                                                                                                                                                                                                                                           | Cutoff                         | Points | Case by <b>Brubaker et al</b><br>(Points) | Total score                                       |
|----------------------------------------------------------------------------------------------------------------------------------------------------------------------------------------------------------------------------------------------------|--------------------------------|--------|-------------------------------------------|---------------------------------------------------|
| ANA or SMA                                                                                                                                                                                                                                         | ≥1:40                          | 1      | 0                                         | <div>Score: 4</div> <div>➔ Non-probable AIH</div> |
| ANA or SMA                                                                                                                                                                                                                                         | ≥1:80                          | 2      | 0                                         |                                                   |
| or LKM                                                                                                                                                                                                                                             | ≥1:40                          |        |                                           |                                                   |
| or SLA                                                                                                                                                                                                                                             | Positive                       |        |                                           |                                                   |
| IgG                                                                                                                                                                                                                                                | >Upper normal limit            | 1      | 0                                         |                                                   |
|                                                                                                                                                                                                                                                    | >1.10 times upper normal limit | 2      |                                           |                                                   |
| Liver histology (evidence of hepatitis is a necessary condition)                                                                                                                                                                                   | Compatible with AIH            | 1      | 2                                         |                                                   |
|                                                                                                                                                                                                                                                    | Typical AIH                    | 2      |                                           |                                                   |
| Absence of viral hepatitis                                                                                                                                                                                                                         | Yes                            | 2      | 2                                         |                                                   |
| AIH: Autoimmune hepatitis; ANA: antinuclear antibodies; LKM: liver-kidney microsomal antibodies; SLA: soluble liver antigen antibodies; SMA: smooth muscle antibodies;<br>*Addition of points achieved for all autoantibodies (maximum, 2 points). |                                |        |                                           |                                                   |

| Variable                                                                                                                                                                                                                                           | Cutoff                         | Points | Case 1 by <i>Shahrani et al</i><br>(Points) | Total score                                       |
|----------------------------------------------------------------------------------------------------------------------------------------------------------------------------------------------------------------------------------------------------|--------------------------------|--------|---------------------------------------------|---------------------------------------------------|
| ANA or SMA                                                                                                                                                                                                                                         | ≥1:40                          | 1      | 0                                           | <div>Score: 4</div> <div>→ Non-probable AIH</div> |
| ANA or SMA                                                                                                                                                                                                                                         | ≥1:80                          | 2      | 0                                           |                                                   |
| or LKM                                                                                                                                                                                                                                             | ≥1:40                          |        |                                             |                                                   |
| or SLA                                                                                                                                                                                                                                             | Positive                       |        |                                             |                                                   |
| IgG                                                                                                                                                                                                                                                | >Upper normal limit            | 1      | 1                                           |                                                   |
|                                                                                                                                                                                                                                                    | >1.10 times upper normal limit | 2      |                                             |                                                   |
| Liver histology (evidence of hepatitis is a necessary condition)                                                                                                                                                                                   | Compatible with AIH            | 1      | 1                                           |                                                   |
|                                                                                                                                                                                                                                                    | Typical AIH                    | 2      |                                             |                                                   |
| Absence of viral hepatitis                                                                                                                                                                                                                         | Yes                            | 2      | 2                                           |                                                   |
| AIH: Autoimmune hepatitis; ANA: antinuclear antibodies; LKM: liver-kidney microsomal antibodies; SLA: soluble liver antigen antibodies; SMA: smooth muscle antibodies;<br>*Addition of points achieved for all autoantibodies (maximum, 2 points). |                                |        |                                             |                                                   |

| Variable                                                                                                                                                                                                                                           | Cutoff                         | Points | Case 2 by <i>Shahrani et al</i><br>(Points) | Total score                                   |
|----------------------------------------------------------------------------------------------------------------------------------------------------------------------------------------------------------------------------------------------------|--------------------------------|--------|---------------------------------------------|-----------------------------------------------|
| ANA or SMA                                                                                                                                                                                                                                         | ≥1:40                          | 1      | 1                                           | <div>Score: 6</div> <div>→ Probable AIH</div> |
| ANA or SMA                                                                                                                                                                                                                                         | ≥1:80                          | 2      | 0                                           |                                               |
| or LKM                                                                                                                                                                                                                                             | ≥1:40                          |        |                                             |                                               |
| or SLA                                                                                                                                                                                                                                             | Positive                       |        |                                             |                                               |
| IgG                                                                                                                                                                                                                                                | >Upper normal limit            | 1      | 1                                           |                                               |
|                                                                                                                                                                                                                                                    | >1.10 times upper normal limit | 2      |                                             |                                               |
| Liver histology (evidence of hepatitis is a necessary condition)                                                                                                                                                                                   | Compatible with AIH            | 1      | 2                                           |                                               |
|                                                                                                                                                                                                                                                    | Typical AIH                    | 2      |                                             |                                               |
| Absence of viral hepatitis                                                                                                                                                                                                                         | Yes                            | 2      | 2                                           |                                               |
| AIH: Autoimmune hepatitis; ANA: antinuclear antibodies; LKM: liver-kidney microsomal antibodies; SLA: soluble liver antigen antibodies; SMA: smooth muscle antibodies;<br>*Addition of points achieved for all autoantibodies (maximum, 2 points). |                                |        |                                             |                                               |

| Variable                                                                                                                                                                                                                                           | Cutoff                         | Points | Case 3 by <i>Shahrani et al</i><br>(Points) | Total score                                       |
|----------------------------------------------------------------------------------------------------------------------------------------------------------------------------------------------------------------------------------------------------|--------------------------------|--------|---------------------------------------------|---------------------------------------------------|
| ANA or SMA                                                                                                                                                                                                                                         | ≥1:40                          | 1      | 1                                           | <div>Score: 5</div> <div>→ Non-probable AIH</div> |
| ANA or SMA                                                                                                                                                                                                                                         | ≥1:80                          | 2      | 0                                           |                                                   |
| or LKM                                                                                                                                                                                                                                             | ≥1:40                          |        |                                             |                                                   |
| or SLA                                                                                                                                                                                                                                             | Positive                       |        |                                             |                                                   |
| IgG                                                                                                                                                                                                                                                | >Upper normal limit            | 1      | 1                                           |                                                   |
|                                                                                                                                                                                                                                                    | >1.10 times upper normal limit | 2      |                                             |                                                   |
| Liver histology (evidence of hepatitis is a necessary condition)                                                                                                                                                                                   | Compatible with AIH            | 1      | 1                                           |                                                   |
|                                                                                                                                                                                                                                                    | Typical AIH                    | 2      |                                             |                                                   |
| Absence of viral hepatitis                                                                                                                                                                                                                         | Yes                            | 2      | 2                                           |                                                   |
| AIH: Autoimmune hepatitis; ANA: antinuclear antibodies; LKM: liver-kidney microsomal antibodies; SLA: soluble liver antigen antibodies; SMA: smooth muscle antibodies;<br>*Addition of points achieved for all autoantibodies (maximum, 2 points). |                                |        |                                             |                                                   |

| Variable                                                                                                                                                                                                                                           | Cutoff                         | Points | Case by <i>Hasegawa et al</i><br>(Points) | Total score                    |
|----------------------------------------------------------------------------------------------------------------------------------------------------------------------------------------------------------------------------------------------------|--------------------------------|--------|-------------------------------------------|--------------------------------|
| ANA or SMA                                                                                                                                                                                                                                         | ≥1:40                          | 1      | 1                                         | Score: 6<br><br>→ Probable AIH |
| ANA or SMA                                                                                                                                                                                                                                         | ≥1:80                          | 2      | 0                                         |                                |
| or LKM                                                                                                                                                                                                                                             | ≥1:40                          |        |                                           |                                |
| or SLA                                                                                                                                                                                                                                             | Positive                       |        |                                           |                                |
| IgG                                                                                                                                                                                                                                                | >Upper normal limit            | 1      | 1                                         |                                |
|                                                                                                                                                                                                                                                    | >1.10 times upper normal limit | 2      |                                           |                                |
| Liver histology (evidence of hepatitis is a necessary condition)                                                                                                                                                                                   | Compatible with AIH            | 1      | 2                                         |                                |
|                                                                                                                                                                                                                                                    | Typical AIH                    | 2      |                                           |                                |
| Absence of viral hepatitis                                                                                                                                                                                                                         | Yes                            | 2      | 2                                         |                                |
| AIH: Autoimmune hepatitis; ANA: antinuclear antibodies; LKM: liver-kidney microsomal antibodies; SLA: soluble liver antigen antibodies; SMA: smooth muscle antibodies;<br>*Addition of points achieved for all autoantibodies (maximum, 2 points). |                                |        |                                           |                                |

| Variable                                                                                                                                                                                                                                           | Cutoff                         | Points | Case by <i>Lasagna et al</i><br>(Points) | Total score                                       |
|----------------------------------------------------------------------------------------------------------------------------------------------------------------------------------------------------------------------------------------------------|--------------------------------|--------|------------------------------------------|---------------------------------------------------|
| ANA or SMA                                                                                                                                                                                                                                         | ≥1:40                          | 1      | 0                                        | <div>Score: 0</div> <div>→ Non-probable AIH</div> |
| ANA or SMA                                                                                                                                                                                                                                         | ≥1:80                          | 2      | 0                                        |                                                   |
| or LKM                                                                                                                                                                                                                                             | ≥1:40                          |        |                                          |                                                   |
| or SLA                                                                                                                                                                                                                                             | Positive                       |        |                                          |                                                   |
| IgG                                                                                                                                                                                                                                                | >Upper normal limit            | 1      | 0                                        |                                                   |
|                                                                                                                                                                                                                                                    | >1.10 times upper normal limit | 2      |                                          |                                                   |
| Liver histology (evidence of hepatitis is a necessary condition)                                                                                                                                                                                   | Compatible with AIH            | 1      | 0                                        |                                                   |
|                                                                                                                                                                                                                                                    | Typical AIH                    | 2      |                                          |                                                   |
| Absence of viral hepatitis                                                                                                                                                                                                                         | Yes                            | 2      | 0                                        |                                                   |
| AIH: Autoimmune hepatitis; ANA: antinuclear antibodies; LKM: liver-kidney microsomal antibodies; SLA: soluble liver antigen antibodies; SMA: smooth muscle antibodies;<br>*Addition of points achieved for all autoantibodies (maximum, 2 points). |                                |        |                                          |                                                   |

| Variable                                                                                                                                                                                                                                        | Cutoff                         | Points | Case 1 by <i>Pinazo-Bandera et al</i> (Points) | Total score                                   |
|-------------------------------------------------------------------------------------------------------------------------------------------------------------------------------------------------------------------------------------------------|--------------------------------|--------|------------------------------------------------|-----------------------------------------------|
| ANA or SMA                                                                                                                                                                                                                                      | ≥1:40                          | 1      | 0                                              | <div>Score: 6</div> <div>→ Probable AIH</div> |
| ANA or SMA                                                                                                                                                                                                                                      | ≥1:80                          | 2      | 2                                              |                                               |
| or LKM                                                                                                                                                                                                                                          | ≥1:40                          |        |                                                |                                               |
| or SLA                                                                                                                                                                                                                                          | Positive                       |        |                                                |                                               |
| IgG                                                                                                                                                                                                                                             | >Upper normal limit            | 1      | 0                                              |                                               |
|                                                                                                                                                                                                                                                 | >1.10 times upper normal limit | 2      |                                                |                                               |
| Liver histology (evidence of hepatitis is a necessary condition)                                                                                                                                                                                | Compatible with AIH            | 1      | 2                                              |                                               |
|                                                                                                                                                                                                                                                 | Typical AIH                    | 2      |                                                |                                               |
| Absence of viral hepatitis                                                                                                                                                                                                                      | Yes                            | 2      | 2                                              |                                               |
| AIH: Autoimmune hepatitis; ANA: antinuclear antibodies; LKM: liver-kidney microsomal antibodies; SLA: soluble liver antigen antibodies; SMA: smooth muscle antibodies; *Addition of points achieved for all autoantibodies (maximum, 2 points). |                                |        |                                                |                                               |

| Variable                                                                                                                                                                                                                                           | Cutoff                         | Points | Case 2 by <i>Pinazo-Bandera et al</i> (Points) | Total score                                       |
|----------------------------------------------------------------------------------------------------------------------------------------------------------------------------------------------------------------------------------------------------|--------------------------------|--------|------------------------------------------------|---------------------------------------------------|
| ANA or SMA                                                                                                                                                                                                                                         | ≥1:40                          | 1      | 0                                              | <div>Score: 4</div> <div>➔ Non-probable AIH</div> |
| ANA or SMA                                                                                                                                                                                                                                         | ≥1:80                          | 2      | 0                                              |                                                   |
| or LKM                                                                                                                                                                                                                                             | ≥1:40                          |        |                                                |                                                   |
| or SLA                                                                                                                                                                                                                                             | Positive                       |        |                                                |                                                   |
| IgG                                                                                                                                                                                                                                                | >Upper normal limit            | 1      | 0                                              |                                                   |
|                                                                                                                                                                                                                                                    | >1.10 times upper normal limit | 2      |                                                |                                                   |
| Liver histology (evidence of hepatitis is a necessary condition)                                                                                                                                                                                   | Compatible with AIH            | 1      | 2                                              |                                                   |
|                                                                                                                                                                                                                                                    | Typical AIH                    | 2      |                                                |                                                   |
| Absence of viral hepatitis                                                                                                                                                                                                                         | Yes                            | 2      | 2                                              |                                                   |
|                                                                                                                                                                                                                                                    |                                |        |                                                |                                                   |
| AIH: Autoimmune hepatitis; ANA: antinuclear antibodies; LKM: liver-kidney microsomal antibodies; SLA: soluble liver antigen antibodies; SMA: smooth muscle antibodies;<br>*Addition of points achieved for all autoantibodies (maximum, 2 points). |                                |        |                                                |                                                   |

| Variable                                                                                                                                                                                                                                        | Cutoff                         | Points | Case by <i>Boettler et al</i> (Points) | Total score                                   |
|-------------------------------------------------------------------------------------------------------------------------------------------------------------------------------------------------------------------------------------------------|--------------------------------|--------|----------------------------------------|-----------------------------------------------|
| ANA or SMA                                                                                                                                                                                                                                      | ≥1:40                          | 1      | 0                                      | <div>Score: 7</div> <div>→ Definite AIH</div> |
| ANA or SMA                                                                                                                                                                                                                                      | ≥1:80                          | 2      | 2                                      |                                               |
| or LKM                                                                                                                                                                                                                                          | ≥1:40                          |        |                                        |                                               |
| or SLA                                                                                                                                                                                                                                          | Positive                       |        |                                        |                                               |
| IgG                                                                                                                                                                                                                                             | >Upper normal limit            | 1      | 1                                      |                                               |
|                                                                                                                                                                                                                                                 | >1.10 times upper normal limit | 2      |                                        |                                               |
| Liver histology (evidence of hepatitis is a necessary condition)                                                                                                                                                                                | Compatible with AIH            | 1      | 2                                      |                                               |
|                                                                                                                                                                                                                                                 | Typical AIH                    | 2      |                                        |                                               |
| Absence of viral hepatitis                                                                                                                                                                                                                      | Yes                            | 2      | 2                                      |                                               |
|                                                                                                                                                                                                                                                 |                                |        |                                        |                                               |
| AIH: Autoimmune hepatitis; ANA: antinuclear antibodies; LKM: liver-kidney microsomal antibodies; SLA: soluble liver antigen antibodies; SMA: smooth muscle antibodies; *Addition of points achieved for all autoantibodies (maximum, 2 points). |                                |        |                                        |                                               |

| Variable                                                                                                                                                                                                                                           | Cutoff                         | Points | Case by <b>Kang et al</b> (Points) | Total score                                   |
|----------------------------------------------------------------------------------------------------------------------------------------------------------------------------------------------------------------------------------------------------|--------------------------------|--------|------------------------------------|-----------------------------------------------|
| ANA or SMA                                                                                                                                                                                                                                         | ≥1:40                          | 1      | 0                                  | <div>Score: 7</div> <div>→ Definite AIH</div> |
| ANA or SMA                                                                                                                                                                                                                                         | ≥1:80                          | 2      | 2                                  |                                               |
| or LKM                                                                                                                                                                                                                                             | ≥1:40                          |        |                                    |                                               |
| or SLA                                                                                                                                                                                                                                             | Positive                       |        |                                    |                                               |
| IgG                                                                                                                                                                                                                                                | >Upper normal limit            | 1      | 1                                  |                                               |
|                                                                                                                                                                                                                                                    | >1.10 times upper normal limit | 2      |                                    |                                               |
| Liver histology (evidence of hepatitis is a necessary condition)                                                                                                                                                                                   | Compatible with AIH            | 1      | 2                                  |                                               |
|                                                                                                                                                                                                                                                    | Typical AIH                    | 2      |                                    |                                               |
| Absence of viral hepatitis                                                                                                                                                                                                                         | Yes                            | 2      | 2                                  |                                               |
| AIH: Autoimmune hepatitis; ANA: antinuclear antibodies; LKM: liver-kidney microsomal antibodies; SLA: soluble liver antigen antibodies; SMA: smooth muscle antibodies;<br>*Addition of points achieved for all autoantibodies (maximum, 2 points). |                                |        |                                    |                                               |

| Variable                                                                                                                                                                                                                                           | Cutoff                         | Points | Case by <i>Ghorbani et al</i> (Points) | Total score                        |
|----------------------------------------------------------------------------------------------------------------------------------------------------------------------------------------------------------------------------------------------------|--------------------------------|--------|----------------------------------------|------------------------------------|
| ANA or SMA                                                                                                                                                                                                                                         | ≥1:40                          | 1      | 0                                      | Score: 3<br><br>➔ Non-probable AIH |
| ANA or SMA                                                                                                                                                                                                                                         | ≥1:80                          | 2      | 0                                      |                                    |
| or LKM                                                                                                                                                                                                                                             | ≥1:40                          |        |                                        |                                    |
| or SLA                                                                                                                                                                                                                                             | Positive                       |        |                                        |                                    |
| IgG                                                                                                                                                                                                                                                | >Upper normal limit            | 1      | 0                                      |                                    |
|                                                                                                                                                                                                                                                    | >1.10 times upper normal limit | 2      |                                        |                                    |
| Liver histology (evidence of hepatitis is a necessary condition)                                                                                                                                                                                   | Compatible with AIH            | 1      | 1                                      |                                    |
|                                                                                                                                                                                                                                                    | Typical AIH                    | 2      |                                        |                                    |
| Absence of viral hepatitis                                                                                                                                                                                                                         | Yes                            | 2      | 2                                      |                                    |
| AIH: Autoimmune hepatitis; ANA: antinuclear antibodies; LKM: liver-kidney microsomal antibodies; SLA: soluble liver antigen antibodies; SMA: smooth muscle antibodies;<br>*Addition of points achieved for all autoantibodies (maximum, 2 points). |                                |        |                                        |                                    |

| Variable                                                                                                                                                                                                                                        | Cutoff                         | Points | Case by <i>Fimiano et al</i> (Points) | Total score                                       |
|-------------------------------------------------------------------------------------------------------------------------------------------------------------------------------------------------------------------------------------------------|--------------------------------|--------|---------------------------------------|---------------------------------------------------|
| ANA or SMA                                                                                                                                                                                                                                      | ≥1:40                          | 1      | 0                                     | <div>Score: 3</div> <div>➔ Non-probable AIH</div> |
| ANA or SMA                                                                                                                                                                                                                                      | ≥1:80                          | 2      | 0                                     |                                                   |
| or LKM                                                                                                                                                                                                                                          | ≥1:40                          |        |                                       |                                                   |
| or SLA                                                                                                                                                                                                                                          | Positive                       |        |                                       |                                                   |
| IgG                                                                                                                                                                                                                                             | >Upper normal limit            | 1      | 1                                     |                                                   |
|                                                                                                                                                                                                                                                 | >1.10 times upper normal limit | 2      |                                       |                                                   |
| Liver histology (evidence of hepatitis is a necessary condition)                                                                                                                                                                                | Compatible with AIH            | 1      | 2                                     |                                                   |
|                                                                                                                                                                                                                                                 | Typical AIH                    | 2      |                                       |                                                   |
| Absence of viral hepatitis                                                                                                                                                                                                                      | Yes                            | 2      | 2                                     |                                                   |
|                                                                                                                                                                                                                                                 |                                |        |                                       |                                                   |
| AIH: Autoimmune hepatitis; ANA: antinuclear antibodies; LKM: liver-kidney microsomal antibodies; SLA: soluble liver antigen antibodies; SMA: smooth muscle antibodies; *Addition of points achieved for all autoantibodies (maximum, 2 points). |                                |        |                                       |                                                   |

| Variable                                                                                                                                                                                                                                           | Cutoff                         | Points | Case by <b>Camacho-Dominguez et al</b> (Points) | Total score                                       |
|----------------------------------------------------------------------------------------------------------------------------------------------------------------------------------------------------------------------------------------------------|--------------------------------|--------|-------------------------------------------------|---------------------------------------------------|
| <b>ANA or SMA</b>                                                                                                                                                                                                                                  | ≥1:40                          | 1      | 0                                               | <div>Score: 3</div> <div>➔ Non-probable AIH</div> |
| <b>ANA or SMA</b>                                                                                                                                                                                                                                  | ≥1:80                          | 2      | 2                                               |                                                   |
| <b>or LKM</b>                                                                                                                                                                                                                                      | ≥1:40                          |        |                                                 |                                                   |
| <b>or SLA</b>                                                                                                                                                                                                                                      | Positive                       |        |                                                 |                                                   |
| <b>IgG</b>                                                                                                                                                                                                                                         | >Upper normal limit            | 1      | 1                                               |                                                   |
|                                                                                                                                                                                                                                                    | >1.10 times upper normal limit | 2      |                                                 |                                                   |
| <b>Liver histology</b> (evidence of hepatitis is a necessary condition)                                                                                                                                                                            | Compatible with AIH            | 1      | 2                                               |                                                   |
|                                                                                                                                                                                                                                                    | Typical AIH                    | 2      |                                                 |                                                   |
| <b>Absence of viral hepatitis</b>                                                                                                                                                                                                                  | Yes                            | 2      | 2                                               |                                                   |
| AIH: Autoimmune hepatitis; ANA: antinuclear antibodies; LKM: liver-kidney microsomal antibodies; SLA: soluble liver antigen antibodies; SMA: smooth muscle antibodies;<br>*Addition of points achieved for all autoantibodies (maximum, 2 points). |                                |        |                                                 |                                                   |

| Variable                                                                                                                                                                                                                                           | Cutoff                         | Points | Cases by <b>Erard et al</b> (Points)                                              | Total score                                                             |
|----------------------------------------------------------------------------------------------------------------------------------------------------------------------------------------------------------------------------------------------------|--------------------------------|--------|-----------------------------------------------------------------------------------|-------------------------------------------------------------------------|
| <b>ANA or SMA</b>                                                                                                                                                                                                                                  | ≥1:40                          | 1      | Values are not available. At least one point for ANA positivity on each patient.  | <div>Score≥ 6 for each patient</div> <div>→ At least probable AIH</div> |
| <b>ANA or SMA</b>                                                                                                                                                                                                                                  | ≥1:80                          | 2      |                                                                                   |                                                                         |
| <b>or LKM</b>                                                                                                                                                                                                                                      | ≥1:40                          |        |                                                                                   |                                                                         |
| <b>or SLA</b>                                                                                                                                                                                                                                      | Positive                       |        |                                                                                   |                                                                         |
| <b>IgG</b>                                                                                                                                                                                                                                         | >Upper normal limit            | 1      | Values are not available. At least one point for IgG increase on each patient.    |                                                                         |
|                                                                                                                                                                                                                                                    | >1.10 times upper normal limit | 2      |                                                                                   |                                                                         |
| <b>Liver histology</b> (evidence of hepatitis is a necessary condition)                                                                                                                                                                            | Compatible with AIH            | 1      | All three patients had liver biopsy typical for AIH. Two points for each.         |                                                                         |
|                                                                                                                                                                                                                                                    | Typical AIH                    | 2      |                                                                                   |                                                                         |
| <b>Absence of viral hepatitis</b>                                                                                                                                                                                                                  | Yes                            | 2      | All three patients were tested negative for viral hepatitis. Two points for each. |                                                                         |
| AIH: Autoimmune hepatitis; ANA: antinuclear antibodies; LKM: liver-kidney microsomal antibodies; SLA: soluble liver antigen antibodies; SMA: smooth muscle antibodies;<br>*Addition of points achieved for all autoantibodies (maximum, 2 points). |                                |        |                                                                                   |                                                                         |

| Variable                                                                                                                                                                                                                                           | Cutoff                         | Points | Case 1 by <i>Suzuki et al</i> (Points) | Total score                                   |
|----------------------------------------------------------------------------------------------------------------------------------------------------------------------------------------------------------------------------------------------------|--------------------------------|--------|----------------------------------------|-----------------------------------------------|
| ANA or SMA                                                                                                                                                                                                                                         | ≥1:40                          | 1      | 1                                      | <div>Score: 6</div> <div>→ Probable AIH</div> |
| ANA or SMA                                                                                                                                                                                                                                         | ≥1:80                          | 2      | 0                                      |                                               |
| or LKM                                                                                                                                                                                                                                             | ≥1:40                          |        |                                        |                                               |
| or SLA                                                                                                                                                                                                                                             | Positive                       |        |                                        |                                               |
| IgG                                                                                                                                                                                                                                                | >Upper normal limit            | 1      | 1                                      |                                               |
|                                                                                                                                                                                                                                                    | >1.10 times upper normal limit | 2      |                                        |                                               |
| Liver histology (evidence of hepatitis is a necessary condition)                                                                                                                                                                                   | Compatible with AIH            | 1      | 2                                      |                                               |
|                                                                                                                                                                                                                                                    | Typical AIH                    | 2      |                                        |                                               |
| Absence of viral hepatitis                                                                                                                                                                                                                         | Yes                            | 2      | 2                                      |                                               |
| AIH: Autoimmune hepatitis; ANA: antinuclear antibodies; LKM: liver-kidney microsomal antibodies; SLA: soluble liver antigen antibodies; SMA: smooth muscle antibodies;<br>*Addition of points achieved for all autoantibodies (maximum, 2 points). |                                |        |                                        |                                               |

| Variable                                                                                                                                                                                                                                           | Cutoff                         | Points | Case 2 by <b>Suzuki et al</b> (Points) | Total score                                   |
|----------------------------------------------------------------------------------------------------------------------------------------------------------------------------------------------------------------------------------------------------|--------------------------------|--------|----------------------------------------|-----------------------------------------------|
| ANA or SMA                                                                                                                                                                                                                                         | ≥1:40                          | 1      | 0                                      | <div>Score: 7</div> <div>→ Definite AIH</div> |
| ANA or SMA                                                                                                                                                                                                                                         | ≥1:80                          | 2      | 2                                      |                                               |
| or LKM                                                                                                                                                                                                                                             | ≥1:40                          |        |                                        |                                               |
| or SLA                                                                                                                                                                                                                                             | Positive                       |        |                                        |                                               |
| IgG                                                                                                                                                                                                                                                | >Upper normal limit            | 1      | 1                                      |                                               |
|                                                                                                                                                                                                                                                    | >1.10 times upper normal limit | 2      |                                        |                                               |
| Liver histology (evidence of hepatitis is a necessary condition)                                                                                                                                                                                   | Compatible with AIH            | 1      | 2                                      |                                               |
|                                                                                                                                                                                                                                                    | Typical AIH                    | 2      |                                        |                                               |
| Absence of viral hepatitis                                                                                                                                                                                                                         | Yes                            | 2      | 2                                      |                                               |
| AIH: Autoimmune hepatitis; ANA: antinuclear antibodies; LKM: liver-kidney microsomal antibodies; SLA: soluble liver antigen antibodies; SMA: smooth muscle antibodies;<br>*Addition of points achieved for all autoantibodies (maximum, 2 points). |                                |        |                                        |                                               |

| Variable                                                                                                                                                                                                                                           | Cutoff                         | Points | Case 3 by <i>Suzuki et al</i> (Points) | Total score                                   |
|----------------------------------------------------------------------------------------------------------------------------------------------------------------------------------------------------------------------------------------------------|--------------------------------|--------|----------------------------------------|-----------------------------------------------|
| ANA or SMA                                                                                                                                                                                                                                         | ≥1:40                          | 1      | 0                                      | <div>Score: 7</div> <div>➔ Definite AIH</div> |
| ANA or SMA                                                                                                                                                                                                                                         | ≥1:80                          | 2      | 2                                      |                                               |
| or LKM                                                                                                                                                                                                                                             | ≥1:40                          |        |                                        |                                               |
| or SLA                                                                                                                                                                                                                                             | Positive                       |        |                                        |                                               |
| IgG                                                                                                                                                                                                                                                | >Upper normal limit            | 1      | 1                                      |                                               |
|                                                                                                                                                                                                                                                    | >1.10 times upper normal limit | 2      |                                        |                                               |
| Liver histology (evidence of hepatitis is a necessary condition)                                                                                                                                                                                   | Compatible with AIH            | 1      | 2                                      |                                               |
|                                                                                                                                                                                                                                                    | Typical AIH                    | 2      |                                        |                                               |
| Absence of viral hepatitis                                                                                                                                                                                                                         | Yes                            | 2      | 2                                      |                                               |
| AIH: Autoimmune hepatitis; ANA: antinuclear antibodies; LKM: liver-kidney microsomal antibodies; SLA: soluble liver antigen antibodies; SMA: smooth muscle antibodies;<br>*Addition of points achieved for all autoantibodies (maximum, 2 points). |                                |        |                                        |                                               |

| Variable                                                                                                                                                                                                                                        | Cutoff                         | Points | Case by <i>Palla et al</i> (Points) | Total score                                   |
|-------------------------------------------------------------------------------------------------------------------------------------------------------------------------------------------------------------------------------------------------|--------------------------------|--------|-------------------------------------|-----------------------------------------------|
| ANA or SMA                                                                                                                                                                                                                                      | ≥1:40                          | 1      | 0                                   | <div>Score: 8</div> <div>→ Definite AIH</div> |
| ANA or SMA                                                                                                                                                                                                                                      | ≥1:80                          | 2      | 2                                   |                                               |
| or LKM                                                                                                                                                                                                                                          | ≥1:40                          |        |                                     |                                               |
| or SLA                                                                                                                                                                                                                                          | Positive                       |        |                                     |                                               |
| IgG                                                                                                                                                                                                                                             | >Upper normal limit            | 1      | 2                                   |                                               |
|                                                                                                                                                                                                                                                 | >1.10 times upper normal limit | 2      |                                     |                                               |
| Liver histology (evidence of hepatitis is a necessary condition)                                                                                                                                                                                | Compatible with AIH            | 1      | 2                                   |                                               |
|                                                                                                                                                                                                                                                 | Typical AIH                    | 2      |                                     |                                               |
| Absence of viral hepatitis                                                                                                                                                                                                                      | Yes                            | 2      | 2                                   |                                               |
| AIH: Autoimmune hepatitis; ANA: antinuclear antibodies; LKM: liver-kidney microsomal antibodies; SLA: soluble liver antigen antibodies; SMA: smooth muscle antibodies; *Addition of points achieved for all autoantibodies (maximum, 2 points). |                                |        |                                     |                                               |

| Variable                                                                                                                                                                                                                                        | Cutoff                         | Points | Case by <i>Zhou et al</i> (Points) | Total score                                   |
|-------------------------------------------------------------------------------------------------------------------------------------------------------------------------------------------------------------------------------------------------|--------------------------------|--------|------------------------------------|-----------------------------------------------|
| ANA or SMA                                                                                                                                                                                                                                      | ≥1:40                          | 1      | 0                                  | <div>Score: 6</div> <div>→ Probable AIH</div> |
| ANA or SMA                                                                                                                                                                                                                                      | ≥1:80                          | 2      | 2                                  |                                               |
| or LKM                                                                                                                                                                                                                                          | ≥1:40                          |        |                                    |                                               |
| or SLA                                                                                                                                                                                                                                          | Positive                       |        |                                    |                                               |
| IgG                                                                                                                                                                                                                                             | >Upper normal limit            | 1      | na                                 |                                               |
|                                                                                                                                                                                                                                                 | >1.10 times upper normal limit | 2      |                                    |                                               |
| Liver histology (evidence of hepatitis is a necessary condition)                                                                                                                                                                                | Compatible with AIH            | 1      | 2                                  |                                               |
|                                                                                                                                                                                                                                                 | Typical AIH                    | 2      |                                    |                                               |
| Absence of viral hepatitis                                                                                                                                                                                                                      | Yes                            | 2      | 2                                  |                                               |
| AIH: Autoimmune hepatitis; ANA: antinuclear antibodies; LKM: liver-kidney microsomal antibodies; SLA: soluble liver antigen antibodies; SMA: smooth muscle antibodies; *Addition of points achieved for all autoantibodies (maximum, 2 points). |                                |        |                                    |                                               |

| Variable                                                                                                                                                                                                                                           | Cutoff                         | Points | Case by <i>Ghielmetti et al</i> (Points) | Total score                                   |
|----------------------------------------------------------------------------------------------------------------------------------------------------------------------------------------------------------------------------------------------------|--------------------------------|--------|------------------------------------------|-----------------------------------------------|
| ANA or SMA                                                                                                                                                                                                                                         | ≥1:40                          | 1      | 0                                        | <div>Score: 6</div> <div>➔ Probable AIH</div> |
| ANA or SMA                                                                                                                                                                                                                                         | ≥1:80                          | 2      | 2                                        |                                               |
| or LKM                                                                                                                                                                                                                                             | ≥1:40                          |        |                                          |                                               |
| or SLA                                                                                                                                                                                                                                             | Positive                       |        |                                          |                                               |
| IgG                                                                                                                                                                                                                                                | >Upper normal limit            | 1      | 1                                        |                                               |
|                                                                                                                                                                                                                                                    | >1.10 times upper normal limit | 2      |                                          |                                               |
| Liver histology (evidence of hepatitis is a necessary condition)                                                                                                                                                                                   | Compatible with AIH            | 1      | 2                                        |                                               |
|                                                                                                                                                                                                                                                    | Typical AIH                    | 2      |                                          |                                               |
| Absence of viral hepatitis                                                                                                                                                                                                                         | Yes                            | 2      | 2                                        |                                               |
| AIH: Autoimmune hepatitis; ANA: antinuclear antibodies; LKM: liver-kidney microsomal antibodies; SLA: soluble liver antigen antibodies; SMA: smooth muscle antibodies;<br>*Addition of points achieved for all autoantibodies (maximum, 2 points). |                                |        |                                          |                                               |

| Variable                                                                                                                                                                                                                                           | Cutoff                         | Points | Case by <i>McShane et al</i> (Points) | Total score                                   |
|----------------------------------------------------------------------------------------------------------------------------------------------------------------------------------------------------------------------------------------------------|--------------------------------|--------|---------------------------------------|-----------------------------------------------|
| ANA or SMA                                                                                                                                                                                                                                         | ≥1:40                          | 1      | 0                                     | <div>Score: 7</div> <div>→ Definite AIH</div> |
| ANA or SMA                                                                                                                                                                                                                                         | ≥1:80                          | 2      | 2                                     |                                               |
| or LKM                                                                                                                                                                                                                                             | ≥1:40                          |        |                                       |                                               |
| or SLA                                                                                                                                                                                                                                             | Positive                       |        |                                       |                                               |
| IgG                                                                                                                                                                                                                                                | >Upper normal limit            | 1      | 1                                     |                                               |
|                                                                                                                                                                                                                                                    | >1.10 times upper normal limit | 2      |                                       |                                               |
| Liver histology (evidence of hepatitis is a necessary condition)                                                                                                                                                                                   | Compatible with AIH            | 1      | 2                                     |                                               |
|                                                                                                                                                                                                                                                    | Typical AIH                    | 2      |                                       |                                               |
| Absence of viral hepatitis                                                                                                                                                                                                                         | Yes                            | 2      | 2                                     |                                               |
| AIH: Autoimmune hepatitis; ANA: antinuclear antibodies; LKM: liver-kidney microsomal antibodies; SLA: soluble liver antigen antibodies; SMA: smooth muscle antibodies;<br>*Addition of points achieved for all autoantibodies (maximum, 2 points). |                                |        |                                       |                                               |

| Variable                                                                                                                                                                                                                                           | Cutoff                         | Points | Case by <i>Clayton-Chubb et al</i> (Points) | Total score                                   |
|----------------------------------------------------------------------------------------------------------------------------------------------------------------------------------------------------------------------------------------------------|--------------------------------|--------|---------------------------------------------|-----------------------------------------------|
| ANA or SMA                                                                                                                                                                                                                                         | ≥1:40                          | 1      | 0                                           | <div>Score: 6</div> <div>→ Probable AIH</div> |
| ANA or SMA                                                                                                                                                                                                                                         | ≥1:80                          | 2      | 2                                           |                                               |
| or LKM                                                                                                                                                                                                                                             | ≥1:40                          |        |                                             |                                               |
| or SLA                                                                                                                                                                                                                                             | Positive                       |        |                                             |                                               |
| IgG                                                                                                                                                                                                                                                | >Upper normal limit            | 1      | 0                                           |                                               |
|                                                                                                                                                                                                                                                    | >1.10 times upper normal limit | 2      |                                             |                                               |
| Liver histology (evidence of hepatitis is a necessary condition)                                                                                                                                                                                   | Compatible with AIH            | 1      | 2                                           |                                               |
|                                                                                                                                                                                                                                                    | Typical AIH                    | 2      |                                             |                                               |
| Absence of viral hepatitis                                                                                                                                                                                                                         | Yes                            | 2      | 2                                           |                                               |
| AIH: Autoimmune hepatitis; ANA: antinuclear antibodies; LKM: liver-kidney microsomal antibodies; SLA: soluble liver antigen antibodies; SMA: smooth muscle antibodies;<br>*Addition of points achieved for all autoantibodies (maximum, 2 points). |                                |        |                                             |                                               |



| Variable                                                                                                                                                                                                                                        | Cutoff                         | Points | Case by <b>Tan et al</b> (Points)                                                      | Total score                                   |
|-------------------------------------------------------------------------------------------------------------------------------------------------------------------------------------------------------------------------------------------------|--------------------------------|--------|----------------------------------------------------------------------------------------|-----------------------------------------------|
| ANA or SMA                                                                                                                                                                                                                                      | ≥1:40                          | 1      | Values are not available. At least one point as the patient was ANA and ASMA positive. | <div>Score ≥7</div> <div>→ Definite AIH</div> |
| ANA or SMA                                                                                                                                                                                                                                      | ≥1:80                          | 2      |                                                                                        |                                               |
| or LKM                                                                                                                                                                                                                                          | ≥1:40                          |        |                                                                                        |                                               |
| or SLA                                                                                                                                                                                                                                          | Positive                       |        |                                                                                        |                                               |
| IgG                                                                                                                                                                                                                                             | >Upper normal limit            | 1      | 2                                                                                      |                                               |
|                                                                                                                                                                                                                                                 | >1.10 times upper normal limit | 2      |                                                                                        |                                               |
| Liver histology (evidence of hepatitis is a necessary condition)                                                                                                                                                                                | Compatible with AIH            | 1      | 2                                                                                      |                                               |
|                                                                                                                                                                                                                                                 | Typical AIH                    | 2      |                                                                                        |                                               |
| Absence of viral hepatitis                                                                                                                                                                                                                      | Yes                            | 2      | 2                                                                                      |                                               |
| AIH: Autoimmune hepatitis; ANA: antinuclear antibodies; LKM: liver-kidney microsomal antibodies; SLA: soluble liver antigen antibodies; SMA: smooth muscle antibodies; *Addition of points achieved for all autoantibodies (maximum, 2 points). |                                |        |                                                                                        |                                               |

| Variable                                                                                                                                                                                                                                           | Cutoff                         | Points | Case by <b>Rocco et al</b> (Points) | Total score                                   |
|----------------------------------------------------------------------------------------------------------------------------------------------------------------------------------------------------------------------------------------------------|--------------------------------|--------|-------------------------------------|-----------------------------------------------|
| ANA or SMA                                                                                                                                                                                                                                         | ≥1:40                          | 1      | 0                                   | <div>Score: 8</div> <div>→ Definite AIH</div> |
| ANA or SMA                                                                                                                                                                                                                                         | ≥1:80                          | 2      | 2                                   |                                               |
| or LKM                                                                                                                                                                                                                                             | ≥1:40                          |        |                                     |                                               |
| or SLA                                                                                                                                                                                                                                             | Positive                       |        |                                     |                                               |
| IgG                                                                                                                                                                                                                                                | >Upper normal limit            | 1      | 2                                   |                                               |
|                                                                                                                                                                                                                                                    | >1.10 times upper normal limit | 2      |                                     |                                               |
| Liver histology (evidence of hepatitis is a necessary condition)                                                                                                                                                                                   | Compatible with AIH            | 1      | 2                                   |                                               |
|                                                                                                                                                                                                                                                    | Typical AIH                    | 2      |                                     |                                               |
| Absence of viral hepatitis                                                                                                                                                                                                                         | Yes                            | 2      | 2                                   |                                               |
| AIH: Autoimmune hepatitis; ANA: antinuclear antibodies; LKM: liver-kidney microsomal antibodies; SLA: soluble liver antigen antibodies; SMA: smooth muscle antibodies;<br>*Addition of points achieved for all autoantibodies (maximum, 2 points). |                                |        |                                     |                                               |

| Variable                                                                                                                                                                                                                                           | Cutoff                         | Points | Case by <i>Bril et al</i> (Points) | Total score                                   |
|----------------------------------------------------------------------------------------------------------------------------------------------------------------------------------------------------------------------------------------------------|--------------------------------|--------|------------------------------------|-----------------------------------------------|
| ANA or SMA                                                                                                                                                                                                                                         | ≥1:40                          | 1      | 0                                  | <div>Score: 6</div> <div>→ Probable AIH</div> |
| ANA or SMA                                                                                                                                                                                                                                         | ≥1:80                          | 2      | 2                                  |                                               |
| or LKM                                                                                                                                                                                                                                             | ≥1:40                          |        |                                    |                                               |
| or SLA                                                                                                                                                                                                                                             | Positive                       |        |                                    |                                               |
| IgG                                                                                                                                                                                                                                                | >Upper normal limit            | 1      | 0                                  |                                               |
|                                                                                                                                                                                                                                                    | >1.10 times upper normal limit | 2      |                                    |                                               |
| Liver histology (evidence of hepatitis is a necessary condition)                                                                                                                                                                                   | Compatible with AIH            | 1      | 2                                  |                                               |
|                                                                                                                                                                                                                                                    | Typical AIH                    | 2      |                                    |                                               |
| Absence of viral hepatitis                                                                                                                                                                                                                         | Yes                            | 2      | 2                                  |                                               |
| AIH: Autoimmune hepatitis; ANA: antinuclear antibodies; LKM: liver-kidney microsomal antibodies; SLA: soluble liver antigen antibodies; SMA: smooth muscle antibodies;<br>*Addition of points achieved for all autoantibodies (maximum, 2 points). |                                |        |                                    |                                               |

| Variable                                                                                                                                                                                                                                        | Cutoff                         | Points | Case by <i>Goulas et al.</i> (Points) | Total score                                   |
|-------------------------------------------------------------------------------------------------------------------------------------------------------------------------------------------------------------------------------------------------|--------------------------------|--------|---------------------------------------|-----------------------------------------------|
| ANA or SMA                                                                                                                                                                                                                                      | ≥1:40                          | 1      | 0                                     | <div>Score: 7</div> <div>→ Definite AIH</div> |
| ANA or SMA                                                                                                                                                                                                                                      | ≥1:80                          | 2      | 2                                     |                                               |
| or LKM                                                                                                                                                                                                                                          | ≥1:40                          |        |                                       |                                               |
| or SLA                                                                                                                                                                                                                                          | Positive                       |        |                                       |                                               |
| IgG                                                                                                                                                                                                                                             | >Upper normal limit            | 1      | 1                                     |                                               |
|                                                                                                                                                                                                                                                 | >1.10 times upper normal limit | 2      |                                       |                                               |
| Liver histology (evidence of hepatitis is a necessary condition)                                                                                                                                                                                | Compatible with AIH            | 1      | 2                                     |                                               |
|                                                                                                                                                                                                                                                 | Typical AIH                    | 2      |                                       |                                               |
| Absence of viral hepatitis                                                                                                                                                                                                                      | Yes                            | 2      | 2                                     |                                               |
| AIH: Autoimmune hepatitis; ANA: antinuclear antibodies; LKM: liver-kidney microsomal antibodies; SLA: soluble liver antigen antibodies; SMA: smooth muscle antibodies; *Addition of points achieved for all autoantibodies (maximum, 2 points). |                                |        |                                       |                                               |

| Variable                                                                                                                                                                                                                                           | Cutoff                         | Points | Case by <i>Lodato et al</i> (Points) | Total score                                       |
|----------------------------------------------------------------------------------------------------------------------------------------------------------------------------------------------------------------------------------------------------|--------------------------------|--------|--------------------------------------|---------------------------------------------------|
| ANA or SMA                                                                                                                                                                                                                                         | ≥1:40                          | 1      | 0                                    | <div>Score: 4</div> <div>➔ Non-probable AIH</div> |
| ANA or SMA                                                                                                                                                                                                                                         | ≥1:80                          | 2      | 0                                    |                                                   |
| or LKM                                                                                                                                                                                                                                             | ≥1:40                          |        |                                      |                                                   |
| or SLA                                                                                                                                                                                                                                             | Positive                       |        |                                      |                                                   |
| IgG                                                                                                                                                                                                                                                | >Upper normal limit            | 1      | 0                                    |                                                   |
|                                                                                                                                                                                                                                                    | >1.10 times upper normal limit | 2      |                                      |                                                   |
| Liver histology (evidence of hepatitis is a necessary condition)                                                                                                                                                                                   | Compatible with AIH            | 1      | 2                                    |                                                   |
|                                                                                                                                                                                                                                                    | Typical AIH                    | 2      |                                      |                                                   |
| Absence of viral hepatitis                                                                                                                                                                                                                         | Yes                            | 2      | 2                                    |                                                   |
| AIH: Autoimmune hepatitis; ANA: antinuclear antibodies; LKM: liver-kidney microsomal antibodies; SLA: soluble liver antigen antibodies; SMA: smooth muscle antibodies;<br>*Addition of points achieved for all autoantibodies (maximum, 2 points). |                                |        |                                      |                                                   |

| Variable                                                                                                                                                                                                                                           | Cutoff                         | Points | Case 1 by <i>Rela et al</i> (Points) | Total score                                   |
|----------------------------------------------------------------------------------------------------------------------------------------------------------------------------------------------------------------------------------------------------|--------------------------------|--------|--------------------------------------|-----------------------------------------------|
| ANA or SMA                                                                                                                                                                                                                                         | ≥1:40                          | 1      | 0                                    | <div>Score: 7</div> <div>→ Definite AIH</div> |
| ANA or SMA                                                                                                                                                                                                                                         | ≥1:80                          | 2      | 2                                    |                                               |
| or LKM                                                                                                                                                                                                                                             | ≥1:40                          |        |                                      |                                               |
| or SLA                                                                                                                                                                                                                                             | Positive                       |        |                                      |                                               |
| IgG                                                                                                                                                                                                                                                | >Upper normal limit            | 1      | 1                                    |                                               |
|                                                                                                                                                                                                                                                    | >1.10 times upper normal limit | 2      |                                      |                                               |
| Liver histology (evidence of hepatitis is a necessary condition)                                                                                                                                                                                   | Compatible with AIH            | 1      | 2                                    |                                               |
|                                                                                                                                                                                                                                                    | Typical AIH                    | 2      |                                      |                                               |
| Absence of viral hepatitis                                                                                                                                                                                                                         | Yes                            | 2      | 2                                    |                                               |
| AIH: Autoimmune hepatitis; ANA: antinuclear antibodies; LKM: liver-kidney microsomal antibodies; SLA: soluble liver antigen antibodies; SMA: smooth muscle antibodies;<br>*Addition of points achieved for all autoantibodies (maximum, 2 points). |                                |        |                                      |                                               |

| Variable                                                                                                                                                                                                                                           | Cutoff                         | Points | Case 2 by <i>Rela et al</i> (Points) | Total score                                       |
|----------------------------------------------------------------------------------------------------------------------------------------------------------------------------------------------------------------------------------------------------|--------------------------------|--------|--------------------------------------|---------------------------------------------------|
| ANA or SMA                                                                                                                                                                                                                                         | ≥1:40                          | 1      | 0                                    | <div>Score: 3</div> <div>→ Non-probable AIH</div> |
| ANA or SMA                                                                                                                                                                                                                                         | ≥1:80                          | 2      | 0                                    |                                                   |
| or LKM                                                                                                                                                                                                                                             | ≥1:40                          |        |                                      |                                                   |
| or SLA                                                                                                                                                                                                                                             | Positive                       |        |                                      |                                                   |
| IgG                                                                                                                                                                                                                                                | >Upper normal limit            | 1      | 0                                    |                                                   |
|                                                                                                                                                                                                                                                    | >1.10 times upper normal limit | 2      |                                      |                                                   |
| Liver histology (evidence of hepatitis is a necessary condition)                                                                                                                                                                                   | Compatible with AIH            | 1      | 1                                    |                                                   |
|                                                                                                                                                                                                                                                    | Typical AIH                    | 2      |                                      |                                                   |
| Absence of viral hepatitis                                                                                                                                                                                                                         | Yes                            | 2      | 2                                    |                                                   |
| AIH: Autoimmune hepatitis; ANA: antinuclear antibodies; LKM: liver-kidney microsomal antibodies; SLA: soluble liver antigen antibodies; SMA: smooth muscle antibodies;<br>*Addition of points achieved for all autoantibodies (maximum, 2 points). |                                |        |                                      |                                                   |

| Variable                                                                                                                                                                                                                                        | Cutoff                         | Points | Case 2 by <b>Zin Tun et al</b> (Points)                                           | Total score                                            |
|-------------------------------------------------------------------------------------------------------------------------------------------------------------------------------------------------------------------------------------------------|--------------------------------|--------|-----------------------------------------------------------------------------------|--------------------------------------------------------|
| ANA or SMA                                                                                                                                                                                                                                      | ≥1:40                          | 1      | No exact values are provided. At least one point as the patient was ANA positive. | <div>Score≥ 6</div> <div>→ At least probable AIH</div> |
| ANA or SMA                                                                                                                                                                                                                                      | ≥1:80                          | 2      |                                                                                   |                                                        |
| or LKM                                                                                                                                                                                                                                          | ≥1:40                          |        |                                                                                   |                                                        |
| or SLA                                                                                                                                                                                                                                          | Positive                       |        |                                                                                   |                                                        |
| IgG                                                                                                                                                                                                                                             | >Upper normal limit            | 1      | 1                                                                                 |                                                        |
|                                                                                                                                                                                                                                                 | >1.10 times upper normal limit | 2      |                                                                                   |                                                        |
| Liver histology (evidence of hepatitis is a necessary condition)                                                                                                                                                                                | Compatible with AIH            | 1      | 2                                                                                 |                                                        |
|                                                                                                                                                                                                                                                 | Typical AIH                    | 2      |                                                                                   |                                                        |
| Absence of viral hepatitis                                                                                                                                                                                                                      | Yes                            | 2      | 2                                                                                 |                                                        |
| AIH: Autoimmune hepatitis; ANA: antinuclear antibodies; LKM: liver-kidney microsomal antibodies; SLA: soluble liver antigen antibodies; SMA: smooth muscle antibodies; *Addition of points achieved for all autoantibodies (maximum, 2 points). |                                |        |                                                                                   |                                                        |

| Variable                                                                                                                                                                                                                                           | Cutoff                         | Points | Case 1 by Ferronato et al. (Points) | Total score                                   |
|----------------------------------------------------------------------------------------------------------------------------------------------------------------------------------------------------------------------------------------------------|--------------------------------|--------|-------------------------------------|-----------------------------------------------|
| ANA or SMA                                                                                                                                                                                                                                         | ≥1:40                          | 1      | 0                                   | <div>Score: 7</div> <div>→ Definite AIH</div> |
| ANA or SMA                                                                                                                                                                                                                                         | ≥1:80                          | 2      |                                     |                                               |
| or LKM                                                                                                                                                                                                                                             | ≥1:40                          |        |                                     |                                               |
| or SLA                                                                                                                                                                                                                                             | Positive                       |        |                                     |                                               |
| IgG                                                                                                                                                                                                                                                | >Upper normal limit            | 1      | 1                                   |                                               |
|                                                                                                                                                                                                                                                    | >1.10 times upper normal limit | 2      |                                     |                                               |
| Liver histology (evidence of hepatitis is a necessary condition)                                                                                                                                                                                   | Compatible with AIH            | 1      | 2                                   |                                               |
|                                                                                                                                                                                                                                                    | Typical AIH                    | 2      |                                     |                                               |
| Absence of viral hepatitis                                                                                                                                                                                                                         | Yes                            | 2      | 2                                   |                                               |
| AIH: Autoimmune hepatitis; ANA: antinuclear antibodies; LKM: liver-kidney microsomal antibodies; SLA: soluble liver antigen antibodies; SMA: smooth muscle antibodies;<br>*Addition of points achieved for all autoantibodies (maximum, 2 points). |                                |        |                                     |                                               |

| Variable                                                                                                                                                                                                                                           | Cutoff                         | Points | Case 2 by <i>Ferronato et al.</i> (Points) | Total score                                   |
|----------------------------------------------------------------------------------------------------------------------------------------------------------------------------------------------------------------------------------------------------|--------------------------------|--------|--------------------------------------------|-----------------------------------------------|
| ANA or SMA                                                                                                                                                                                                                                         | ≥1:40                          | 1      | 0                                          | <div>Score: 7</div> <div>→ Definite AIH</div> |
| ANA or SMA                                                                                                                                                                                                                                         | ≥1:80                          | 2      | 2                                          |                                               |
| or LKM                                                                                                                                                                                                                                             | ≥1:40                          |        |                                            |                                               |
| or SLA                                                                                                                                                                                                                                             | Positive                       |        |                                            |                                               |
| IgG                                                                                                                                                                                                                                                | >Upper normal limit            | 1      | 1                                          |                                               |
|                                                                                                                                                                                                                                                    | >1.10 times upper normal limit | 2      |                                            |                                               |
| Liver histology (evidence of hepatitis is a necessary condition)                                                                                                                                                                                   | Compatible with AIH            | 1      | 2                                          |                                               |
|                                                                                                                                                                                                                                                    | Typical AIH                    | 2      |                                            |                                               |
| Absence of viral hepatitis                                                                                                                                                                                                                         | Yes                            | 2      | 2                                          |                                               |
| AIH: Autoimmune hepatitis; ANA: antinuclear antibodies; LKM: liver-kidney microsomal antibodies; SLA: soluble liver antigen antibodies; SMA: smooth muscle antibodies;<br>*Addition of points achieved for all autoantibodies (maximum, 2 points). |                                |        |                                            |                                               |

| Variable                                                                                                                                                                                                                                           | Cutoff                         | Points | Case 3 by <i>Ferronato et al.</i> (Points) | Total score                                   |
|----------------------------------------------------------------------------------------------------------------------------------------------------------------------------------------------------------------------------------------------------|--------------------------------|--------|--------------------------------------------|-----------------------------------------------|
| ANA or SMA                                                                                                                                                                                                                                         | ≥1:40                          | 1      | 0                                          | <div>Score: 7</div> <div>→ Definite AIH</div> |
| ANA or SMA                                                                                                                                                                                                                                         | ≥1:80                          | 2      | 2                                          |                                               |
| or LKM                                                                                                                                                                                                                                             | ≥1:40                          |        |                                            |                                               |
| or SLA                                                                                                                                                                                                                                             | Positive                       |        |                                            |                                               |
| IgG                                                                                                                                                                                                                                                | >Upper normal limit            | 1      | 0                                          |                                               |
|                                                                                                                                                                                                                                                    | >1.10 times upper normal limit | 2      |                                            |                                               |
| Liver histology (evidence of hepatitis is a necessary condition)                                                                                                                                                                                   | Compatible with AIH            | 1      | 2                                          |                                               |
|                                                                                                                                                                                                                                                    | Typical AIH                    | 2      |                                            |                                               |
| Absence of viral hepatitis                                                                                                                                                                                                                         | Yes                            | 2      | 2                                          |                                               |
| AIH: Autoimmune hepatitis; ANA: antinuclear antibodies; LKM: liver-kidney microsomal antibodies; SLA: soluble liver antigen antibodies; SMA: smooth muscle antibodies;<br>*Addition of points achieved for all autoantibodies (maximum, 2 points). |                                |        |                                            |                                               |

| Variable                                                                                                                                                                                                                                           | Cutoff                         | Points | Case by <i>Mahalingham et al</i> (Points) | Total score                                   |
|----------------------------------------------------------------------------------------------------------------------------------------------------------------------------------------------------------------------------------------------------|--------------------------------|--------|-------------------------------------------|-----------------------------------------------|
| ANA or SMA                                                                                                                                                                                                                                         | ≥1:40                          | 1      | 0                                         | <div>Score: 6</div> <div>→ Probable AIH</div> |
| ANA or SMA                                                                                                                                                                                                                                         | ≥1:80                          | 2      | 2                                         |                                               |
| or LKM                                                                                                                                                                                                                                             | ≥1:40                          |        |                                           |                                               |
| or SLA                                                                                                                                                                                                                                             | Positive                       |        |                                           |                                               |
| IgG                                                                                                                                                                                                                                                | >Upper normal limit            | 1      | 0                                         |                                               |
|                                                                                                                                                                                                                                                    | >1.10 times upper normal limit | 2      |                                           |                                               |
| Liver histology (evidence of hepatitis is a necessary condition)                                                                                                                                                                                   | Compatible with AIH            | 1      | 2                                         |                                               |
|                                                                                                                                                                                                                                                    | Typical AIH                    | 2      |                                           |                                               |
| Absence of viral hepatitis                                                                                                                                                                                                                         | Yes                            | 2      | 2                                         |                                               |
| AIH: Autoimmune hepatitis; ANA: antinuclear antibodies; LKM: liver-kidney microsomal antibodies; SLA: soluble liver antigen antibodies; SMA: smooth muscle antibodies;<br>*Addition of points achieved for all autoantibodies (maximum, 2 points). |                                |        |                                           |                                               |

| Variable                                                                                                                                                                                                                                           | Cutoff                         | Points | Case by <i>Lee et al</i> (Points) | Total score                                   |
|----------------------------------------------------------------------------------------------------------------------------------------------------------------------------------------------------------------------------------------------------|--------------------------------|--------|-----------------------------------|-----------------------------------------------|
| ANA or SMA                                                                                                                                                                                                                                         | ≥1:40                          | 1      | 0                                 | <div>Score: 6</div> <div>➔ Probable AIH</div> |
| ANA or SMA                                                                                                                                                                                                                                         | ≥1:80                          | 2      | 2                                 |                                               |
| or LKM                                                                                                                                                                                                                                             | ≥1:40                          |        |                                   |                                               |
| or SLA                                                                                                                                                                                                                                             | Positive                       |        |                                   |                                               |
| IgG                                                                                                                                                                                                                                                | >Upper normal limit            | 1      | 0                                 |                                               |
|                                                                                                                                                                                                                                                    | >1.10 times upper normal limit | 2      |                                   |                                               |
| Liver histology (evidence of hepatitis is a necessary condition)                                                                                                                                                                                   | Compatible with AIH            | 1      | 2                                 |                                               |
|                                                                                                                                                                                                                                                    | Typical AIH                    | 2      |                                   |                                               |
| Absence of viral hepatitis                                                                                                                                                                                                                         | Yes                            | 2      | 2                                 |                                               |
| AIH: Autoimmune hepatitis; ANA: antinuclear antibodies; LKM: liver-kidney microsomal antibodies; SLA: soluble liver antigen antibodies; SMA: smooth muscle antibodies;<br>*Addition of points achieved for all autoantibodies (maximum, 2 points). |                                |        |                                   |                                               |
