# Supplementary material for: Vaccine-Related Autoimmune Hepatitis: Emerging Association with SARS-CoV-2 Vaccination or Coincidence?
Source: MDPI journal article supplement (doi:10.3390/vaccines10122073), 2022-12-04
Supplement: s1 [file s1]

## Naranjo Nomogram for Adverse Drug Reaction Assessment

### Probability

Definite: Score  $\geq 9$

Probable: 5-8

Possible: 1-4

Doubtful:  $\leq 0$

(Michel DJ, Knobel Lc. Comparison of three algorithms used to evaluate adverse drug reactions. Am J Hosp Pharm. 1986; 43:1711)

| Case 1 by: <b>Torrente et al</b>                                                                               | Yes | No | Do not know | Score | Comment                                                                                                                                                                                                                                      |
|----------------------------------------------------------------------------------------------------------------|-----|----|-------------|-------|----------------------------------------------------------------------------------------------------------------------------------------------------------------------------------------------------------------------------------------------|
| 1. Are there previous conclusive reports on this reaction?                                                     | +1  | 0  | 0           | 1     | ≥2 published reports in which the adverse reaction has been described in detail<br>Adverse reaction appeared soon after vaccination<br>Rapid improvement after corticosteroids and azathioprine administration<br>Biopsy conformation of AIH |
| 2. Did the adverse event appear after the suspected drug was administered?                                     | +2  | -1 | 0           | 2     |                                                                                                                                                                                                                                              |
| 3. Did the adverse reaction improve when the drug was discontinued, or a specific antagonist was administered? | +1  | 0  | 0           | 1     |                                                                                                                                                                                                                                              |
| 4. Did the adverse reaction reappear when the drug was readministered?                                         | +2  | -1 | 0           | 0     |                                                                                                                                                                                                                                              |
| 5. Are there alternative causes (other than the drug) that could on their own have caused the reaction?        | -1  | +2 | 0           | 0     |                                                                                                                                                                                                                                              |
| 6. Did the reaction appeared when a placebo was given?                                                         | -1  | +1 | 0           | 0     |                                                                                                                                                                                                                                              |
| 7. Was the drug detected in the blood (or other body fluids) in concentrations known to be toxic?              | +1  | 0  | 0           | 0     |                                                                                                                                                                                                                                              |
| 8. Was the reaction more severe when the dose was increased, or less severe when dose decreased?               | +1  | 0  | 0           | 0     |                                                                                                                                                                                                                                              |
| 9. Did the patient have a similar reaction to the same or similar drugs in any previous exposure?              | +1  | 0  | 0           | 0     |                                                                                                                                                                                                                                              |
| 10. Was the adverse event confirmed by any objective evidence?                                                 | +1  | 0  | 0           | 1     |                                                                                                                                                                                                                                              |
| Total score: 5→ Probable adverse drug reaction                                                                 |     |    |             |       |                                                                                                                                                                                                                                              |

| Case 2, 3, 4, 5 by: <b>Izagirre et al</b>                                                                           | Yes | No | Do not know | Score                  | Comment                                                                                                                                                                                                                                                                                                                                                                                                                             |
|---------------------------------------------------------------------------------------------------------------------|-----|----|-------------|------------------------|-------------------------------------------------------------------------------------------------------------------------------------------------------------------------------------------------------------------------------------------------------------------------------------------------------------------------------------------------------------------------------------------------------------------------------------|
| 1. Are there previous conclusive reports on this reaction?                                                          | +1  | 0  | 0           | 1                      | $\geq 2$ published reports in which the adverse reaction has been described in detail<br>Adverse reaction appeared soon after vaccination<br>Rapid improvement after immunomodulators administration for 3 of the patients. One of the patients did not need any drug remedy.<br>3 patients had booster dose without any complaints<br><br>Biopsy conformation of AIH for 3 of the patients. One patient did not have liver biopsy. |
| 2. Did the adverse event appear after the suspected drug was administered?                                          | +2  | -1 | 0           | 2                      |                                                                                                                                                                                                                                                                                                                                                                                                                                     |
| 3. Did the adverse reaction improve when the drug was discontinued, or a specific antagonist was administered?      | +1  | 0  | 0           | Score may be 0 to 1    |                                                                                                                                                                                                                                                                                                                                                                                                                                     |
| 4. Did the adverse reaction reappear when the drug was readministered?                                              | +2  | -1 | 0           | Score may be (-)1 to 0 |                                                                                                                                                                                                                                                                                                                                                                                                                                     |
| 5. Are there alternative causes (other than the drug) that could on their own have caused the reaction?             | -1  | +2 | 0           | 0                      |                                                                                                                                                                                                                                                                                                                                                                                                                                     |
| 6. Did the reaction appeared when a placebo was given?                                                              | -1  | +1 | 0           | 0                      |                                                                                                                                                                                                                                                                                                                                                                                                                                     |
| 7. Was the drug detected in the blood (or other body fluids) in concentrations known to be toxic?                   | +1  | 0  | 0           | 0                      |                                                                                                                                                                                                                                                                                                                                                                                                                                     |
| 8. Was the reaction more severe when the dose was increased, or less severe when dose decreased?                    | +1  | 0  | 0           | 0                      |                                                                                                                                                                                                                                                                                                                                                                                                                                     |
| 9. Did the patient have a similar reaction to the same or similar drugs in any previous exposure?                   | +1  | 0  | 0           | 0                      |                                                                                                                                                                                                                                                                                                                                                                                                                                     |
| 10. Was the adverse event confirmed by any objective evidence?                                                      | +1  | 0  | 0           | Score may be 0 to 1    |                                                                                                                                                                                                                                                                                                                                                                                                                                     |
| Total score may be from <b>2 to 5</b> for each patient $\rightarrow$ <b>Possible/Probable adverse drug reaction</b> |     |    |             |                        |                                                                                                                                                                                                                                                                                                                                                                                                                                     |

| Case 6 by: <b>Barary et al</b>                                                                                 | Yes | No | Do not know | Score | Comment                                                                                                                                                                                                                                                                                                                                                           |
|----------------------------------------------------------------------------------------------------------------|-----|----|-------------|-------|-------------------------------------------------------------------------------------------------------------------------------------------------------------------------------------------------------------------------------------------------------------------------------------------------------------------------------------------------------------------|
| 1. Are there previous conclusive reports on this reaction?                                                     | +1  | 0  | 0           | 1     | <div>≥2 published reports in which the adverse reaction has been described in detail</div> <div>Adverse reaction appeared soon after vaccination</div> <div>No improvement after high-dose corticosteroids administration.</div> <div>The patient was treated with hepatotoxic agents for psychiatric disease</div> <div>Biopsy was not compatible with AIH</div> |
| 2. Did the adverse event appear after the suspected drug was administered?                                     | +2  | -1 | 0           | 2     |                                                                                                                                                                                                                                                                                                                                                                   |
| 3. Did the adverse reaction improve when the drug was discontinued, or a specific antagonist was administered? | +1  | 0  | 0           | 0     |                                                                                                                                                                                                                                                                                                                                                                   |
| 4. Did the adverse reaction reappear when the drug was readministered?                                         | +2  | -1 | 0           | 0     |                                                                                                                                                                                                                                                                                                                                                                   |
| 5. Are there alternative causes (other than the drug) that could on their own have caused the reaction?        | -1  | +2 | 0           | -1    |                                                                                                                                                                                                                                                                                                                                                                   |
| 6. Did the reaction appeared when a placebo was given?                                                         | -1  | +1 | 0           | 0     |                                                                                                                                                                                                                                                                                                                                                                   |
| 7. Was the drug detected in the blood (or other body fluids) in concentrations known to be toxic?              | +1  | 0  | 0           | 0     |                                                                                                                                                                                                                                                                                                                                                                   |
| 8. Was the reaction more severe when the dose was increased, or less severe when dose decreased?               | +1  | 0  | 0           | 0     |                                                                                                                                                                                                                                                                                                                                                                   |
| 9. Did the patient have a similar reaction to the same or similar drugs in any previous exposure?              | +1  | 0  | 0           | 0     |                                                                                                                                                                                                                                                                                                                                                                   |
| 10. Was the adverse event confirmed by any objective evidence?                                                 | +1  | 0  | 0           | 0     |                                                                                                                                                                                                                                                                                                                                                                   |
| Total score: 2 →Possible adverse drug reaction                                                                 |     |    |             |       |                                                                                                                                                                                                                                                                                                                                                                   |

| Case 7 by: <b>Mekritthikrai et al</b>                                                                          | Yes | No | Do not know | Score | Comment                                                                                                                                                                                |
|----------------------------------------------------------------------------------------------------------------|-----|----|-------------|-------|----------------------------------------------------------------------------------------------------------------------------------------------------------------------------------------|
| 1. Are there previous conclusive reports on this reaction?                                                     | +1  | 0  | 0           | 1     | ≥2 published reports in which the adverse reaction has been described in detail<br>Adverse reaction appeared soon after vaccination<br>Rapid improvement after immunomodulator therapy |
| 2. Did the adverse event appear after the suspected drug was administered?                                     | +2  | -1 | 0           | 2     |                                                                                                                                                                                        |
| 3. Did the adverse reaction improve when the drug was discontinued, or a specific antagonist was administered? | +1  | 0  | 0           | 1     |                                                                                                                                                                                        |
| 4. Did the adverse reaction reappear when the drug was readministered?                                         | +2  | -1 | 0           | 0     |                                                                                                                                                                                        |
| 5. Are there alternative causes (other than the drug) that could on their own have caused the reaction?        | -1  | +2 | 0           | 2     | No known agent or condition that could provoke acute hepatitis                                                                                                                         |
| 6. Did the reaction appeared when a placebo was given?                                                         | -1  | +1 | 0           | 0     |                                                                                                                                                                                        |
| 7. Was the drug detected in the blood (or other body fluids) in concentrations known to be toxic?              | +1  | 0  | 0           | 0     |                                                                                                                                                                                        |
| 8. Was the reaction more severe when the dose was increased, or less severe when dose decreased?               | +1  | 0  | 0           | 0     |                                                                                                                                                                                        |
| 9. Did the patient have a similar reaction to the same or similar drugs in any previous exposure?              | +1  | 0  | 0           | 0     | Biopsy typical for AIH                                                                                                                                                                 |
| 10. Was the adverse event confirmed by any objective evidence?                                                 | +1  | 0  | 0           | 1     |                                                                                                                                                                                        |
| Total score: 7 → Probable adverse drug reaction                                                                |     |    |             |       |                                                                                                                                                                                        |

| Case 8 by: <b>Brubaker et al</b>                                                                               | Yes | No | Do not know | Score | Comment                                                                                                                             |
|----------------------------------------------------------------------------------------------------------------|-----|----|-------------|-------|-------------------------------------------------------------------------------------------------------------------------------------|
| 1. Are there previous conclusive reports on this reaction?                                                     | +1  | 0  | 0           | 1     | ≥2 published reports in which the adverse reaction has been described in detail<br>Adverse reaction appeared soon after vaccination |
| 2. Did the adverse event appear after the suspected drug was administered?                                     | +2  | -1 | 0           | 2     |                                                                                                                                     |
| 3. Did the adverse reaction improve when the drug was discontinued, or a specific antagonist was administered? | +1  | 0  | 0           | 0     |                                                                                                                                     |
| 4. Did the adverse reaction reappear when the drug was readministered?                                         | +2  | -1 | 0           | 0     |                                                                                                                                     |
| 5. Are there alternative causes (other than the drug) that could on their own have caused the reaction?        | -1  | +2 | 0           | 2     | No known agent or condition that could flare of AIH                                                                                 |
| 6. Did the reaction appeared when a placebo was given?                                                         | -1  | +1 | 0           | 0     |                                                                                                                                     |
| 7. Was the drug detected in the blood (or other body fluids) in concentrations known to be toxic?              | +1  | 0  | 0           | 0     |                                                                                                                                     |
| 8. Was the reaction more severe when the dose was increased, or less severe when dose decreased?               | +1  | 0  | 0           | 0     |                                                                                                                                     |
| 9. Did the patient have a similar reaction to the same or similar drugs in any previous exposure?              | +1  | 0  | 0           | 0     | Elevation of ASMA and hepatic enzymes. Biopsy confirmed AIH in the past.                                                            |
| 10. Was the adverse event confirmed by any objective evidence?                                                 | +1  | 0  | 0           | 1     |                                                                                                                                     |
| Total score: 6 → Probable adverse drug reaction                                                                |     |    |             |       |                                                                                                                                     |

| Case 9 by: <b>Shahrani et al</b>                                                                               | Yes | No | Do not know | Score | Comment                                                                                                                                                                 |
|----------------------------------------------------------------------------------------------------------------|-----|----|-------------|-------|-------------------------------------------------------------------------------------------------------------------------------------------------------------------------|
| 1. Are there previous conclusive reports on this reaction?                                                     | +1  | 0  | 0           | 1     | ≥2 published reports in which the adverse reaction has been described in detail<br>Adverse reaction appeared soon after vaccination<br>Improvement with corticosteroids |
| 2. Did the adverse event appear after the suspected drug was administered?                                     | +2  | -1 | 0           | 2     |                                                                                                                                                                         |
| 3. Did the adverse reaction improve when the drug was discontinued, or a specific antagonist was administered? | +1  | 0  | 0           | 1     |                                                                                                                                                                         |
| 4. Did the adverse reaction reappear when the drug was readministered?                                         | +2  | -1 | 0           | 0     |                                                                                                                                                                         |
| 5. Are there alternative causes (other than the drug) that could on their own have caused the reaction?        | -1  | +2 | 0           | 2     | No known agent or condition that could lead to AIH                                                                                                                      |
| 6. Did the reaction appeared when a placebo was given?                                                         | -1  | +1 | 0           | 0     |                                                                                                                                                                         |
| 7. Was the drug detected in the blood (or other body fluids) in concentrations known to be toxic?              | +1  | 0  | 0           | 0     |                                                                                                                                                                         |
| 8. Was the reaction more severe when the dose was increased, or less severe when dose decreased?               | +1  | 0  | 0           | 0     |                                                                                                                                                                         |
| 9. Did the patient have a similar reaction to the same or similar drugs in any previous exposure?              | +1  | 0  | 0           | 0     | Biopsy compatible with AIH                                                                                                                                              |
| 10. Was the adverse event confirmed by any objective evidence?                                                 | +1  | 0  | 0           | 1     |                                                                                                                                                                         |
| Total score: 7 → Probable adverse drug reaction                                                                |     |    |             |       |                                                                                                                                                                         |

| Case 10 by: <b>Shahrani et al</b>                                                                              | Yes | No | Do not know | Score | Comment                                                                                                                                                                           |
|----------------------------------------------------------------------------------------------------------------|-----|----|-------------|-------|-----------------------------------------------------------------------------------------------------------------------------------------------------------------------------------|
| 1. Are there previous conclusive reports on this reaction?                                                     | +1  | 0  | 0           | 1     | ≥2 published reports in which the adverse reaction has been described in detail<br>Adverse reaction appeared soon after vaccination<br>Temporary improvement with corticosteroids |
| 2. Did the adverse event appear after the suspected drug was administered?                                     | +2  | -1 | 0           | 2     |                                                                                                                                                                                   |
| 3. Did the adverse reaction improve when the drug was discontinued, or a specific antagonist was administered? | +1  | 0  | 0           | 1     |                                                                                                                                                                                   |
| 4. Did the adverse reaction reappear when the drug was readministered?                                         | +2  | -1 | 0           | 0     |                                                                                                                                                                                   |
| 5. Are there alternative causes (other than the drug) that could on their own have caused the reaction?        | -1  | +2 | 0           | 2     | No known agent or condition that could lead to AIH                                                                                                                                |
| 6. Did the reaction appeared when a placebo was given?                                                         | -1  | +1 | 0           | 0     |                                                                                                                                                                                   |
| 7. Was the drug detected in the blood (or other body fluids) in concentrations known to be toxic?              | +1  | 0  | 0           | 0     |                                                                                                                                                                                   |
| 8. Was the reaction more severe when the dose was increased, or less severe when dose decreased?               | +1  | 0  | 0           | 0     |                                                                                                                                                                                   |
| 9. Did the patient have a similar reaction to the same or similar drugs in any previous exposure?              | +1  | 0  | 0           | 0     | Biopsy typical for AIH                                                                                                                                                            |
| 10. Was the adverse event confirmed by any objective evidence?                                                 | +1  | 0  | 0           | 1     |                                                                                                                                                                                   |
| Total score: 7 → Probable adverse drug reaction                                                                |     |    |             |       |                                                                                                                                                                                   |

| Case 11 by: <i>Shahrani et al</i>                                                                              | Yes | No | Do not know | Score | Comment                                                                                                                                                                 |
|----------------------------------------------------------------------------------------------------------------|-----|----|-------------|-------|-------------------------------------------------------------------------------------------------------------------------------------------------------------------------|
| 1. Are there previous conclusive reports on this reaction?                                                     | +1  | 0  | 0           | 1     | ≥2 published reports in which the adverse reaction has been described in detail<br>Adverse reaction appeared soon after vaccination<br>Improvement with corticosteroids |
| 2. Did the adverse event appear after the suspected drug was administered?                                     | +2  | -1 | 0           | 2     |                                                                                                                                                                         |
| 3. Did the adverse reaction improve when the drug was discontinued, or a specific antagonist was administered? | +1  | 0  | 0           | 1     |                                                                                                                                                                         |
| 4. Did the adverse reaction reappear when the drug was readministered?                                         | +2  | -1 | 0           | 0     |                                                                                                                                                                         |
| 5. Are there alternative causes (other than the drug) that could on their own have caused the reaction?        | -1  | +2 | 0           | 2     | No known agent or condition that could lead to AIH                                                                                                                      |
| 6. Did the reaction appeared when a placebo was given?                                                         | -1  | +1 | 0           | 0     |                                                                                                                                                                         |
| 7. Was the drug detected in the blood (or other body fluids) in concentrations known to be toxic?              | +1  | 0  | 0           | 0     | Biopsy compatible with AIH                                                                                                                                              |
| 8. Was the reaction more severe when the dose was increased, or less severe when dose decreased?               | +1  | 0  | 0           | 0     |                                                                                                                                                                         |
| 9. Did the patient have a similar reaction to the same or similar drugs in any previous exposure?              | +1  | 0  | 0           | 0     |                                                                                                                                                                         |
| 10. Was the adverse event confirmed by any objective evidence?                                                 | +1  | 0  | 0           | 1     |                                                                                                                                                                         |
| Total score: 7 → Probable adverse drug reaction                                                                |     |    |             |       |                                                                                                                                                                         |

| Case 12 by: <b>Hasegawa et al</b>                                                                              | Yes | No | Do not know | Score | Comment                                                                                                                                                                        |
|----------------------------------------------------------------------------------------------------------------|-----|----|-------------|-------|--------------------------------------------------------------------------------------------------------------------------------------------------------------------------------|
| 1. Are there previous conclusive reports on this reaction?                                                     | +1  | 0  | 0           | 1     | ≥2 published reports in which the adverse reaction has been described in detail<br>Adverse reaction appeared soon after vaccination<br>Rapid improvement with immunomodulators |
| 2. Did the adverse event appear after the suspected drug was administered?                                     | +2  | -1 | 0           | 2     |                                                                                                                                                                                |
| 3. Did the adverse reaction improve when the drug was discontinued, or a specific antagonist was administered? | +1  | 0  | 0           | 1     |                                                                                                                                                                                |
| 4. Did the adverse reaction reappear when the drug was readministered?                                         | +2  | -1 | 0           | 0     |                                                                                                                                                                                |
| 5. Are there alternative causes (other than the drug) that could on their own have caused the reaction?        | -1  | +2 | 0           | 2     | No known agent or condition that could lead to AIH                                                                                                                             |
| 6. Did the reaction appeared when a placebo was given?                                                         | -1  | +1 | 0           | 0     |                                                                                                                                                                                |
| 7. Was the drug detected in the blood (or other body fluids) in concentrations known to be toxic?              | +1  | 0  | 0           | 0     | Biopsy typical for AIH                                                                                                                                                         |
| 8. Was the reaction more severe when the dose was increased, or less severe when dose decreased?               | +1  | 0  | 0           | 0     |                                                                                                                                                                                |
| 9. Did the patient have a similar reaction to the same or similar drugs in any previous exposure?              | +1  | 0  | 0           | 0     |                                                                                                                                                                                |
| 10. Was the adverse event confirmed by any objective evidence?                                                 | +1  | 0  | 0           | 1     |                                                                                                                                                                                |
| Total score: 7 → Probable adverse drug reaction                                                                |     |    |             |       |                                                                                                                                                                                |

| Case 13 by: <i>Lasagna et al</i>                                                                               | Yes | No | Do not know | Score | Comment                                                                                                                                                                        |
|----------------------------------------------------------------------------------------------------------------|-----|----|-------------|-------|--------------------------------------------------------------------------------------------------------------------------------------------------------------------------------|
| 1. Are there previous conclusive reports on this reaction?                                                     | +1  | 0  | 0           | 1     | ≥2 published reports in which the adverse reaction has been described in detail<br>Adverse reaction appeared soon after vaccination<br>Rapid improvement with immunomodulators |
| 2. Did the adverse event appear after the suspected drug was administered?                                     | +2  | -1 | 0           | 2     |                                                                                                                                                                                |
| 3. Did the adverse reaction improve when the drug was discontinued, or a specific antagonist was administered? | +1  | 0  | 0           | 1     |                                                                                                                                                                                |
| 4. Did the adverse reaction reappear when the drug was readministered?                                         | +2  | -1 | 0           | 0     |                                                                                                                                                                                |
| 5. Are there alternative causes (other than the drug) that could on their own have caused the reaction?        | -1  | +2 | 0           | -1    | Cancer patient on immunotherapy                                                                                                                                                |
| 6. Did the reaction appeared when a placebo was given?                                                         | -1  | +1 | 0           | 0     |                                                                                                                                                                                |
| 7. Was the drug detected in the blood (or other body fluids) in concentrations known to be toxic?              | +1  | 0  | 0           | 0     | Biopsy non-consistent with AIH                                                                                                                                                 |
| 8. Was the reaction more severe when the dose was increased, or less severe when dose decreased?               | +1  | 0  | 0           | 0     |                                                                                                                                                                                |
| 9. Did the patient have a similar reaction to the same or similar drugs in any previous exposure?              | +1  | 0  | 0           | 0     |                                                                                                                                                                                |
| 10. Was the adverse event confirmed by any objective evidence?                                                 | +1  | 0  | 0           | 0     |                                                                                                                                                                                |
| Total score: 3 → Possible adverse drug reaction                                                                |     |    |             |       |                                                                                                                                                                                |

| Case 14 by: <b>Pinazo-Bandera et al</b>                                                                        | Yes | No | Do not know | Score | Comment                                                                                                                                                                  |
|----------------------------------------------------------------------------------------------------------------|-----|----|-------------|-------|--------------------------------------------------------------------------------------------------------------------------------------------------------------------------|
| 1. Are there previous conclusive reports on this reaction?                                                     | +1  | 0  | 0           | 1     | ≥2 published reports in which the adverse reaction has been described in detail<br>Adverse reaction appeared soon after vaccination<br>Improvement with immunomodulators |
| 2. Did the adverse event appear after the suspected drug was administered?                                     | +2  | -1 | 0           | 2     |                                                                                                                                                                          |
| 3. Did the adverse reaction improve when the drug was discontinued, or a specific antagonist was administered? | +1  | 0  | 0           | 1     |                                                                                                                                                                          |
| 4. Did the adverse reaction reappear when the drug was readministered?                                         | +2  | -1 | 0           | 0     |                                                                                                                                                                          |
| 5. Are there alternative causes (other than the drug) that could on their own have caused the reaction?        | -1  | +2 | 0           | 2     | No known agent or condition that could lead to AIH                                                                                                                       |
| 6. Did the reaction appeared when a placebo was given?                                                         | -1  | +1 | 0           | 0     |                                                                                                                                                                          |
| 7. Was the drug detected in the blood (or other body fluids) in concentrations known to be toxic?              | +1  | 0  | 0           | 0     | Biopsy consistent with AIH                                                                                                                                               |
| 8. Was the reaction more severe when the dose was increased, or less severe when dose decreased?               | +1  | 0  | 0           | 0     |                                                                                                                                                                          |
| 9. Did the patient have a similar reaction to the same or similar drugs in any previous exposure?              | +1  | 0  | 0           | 0     |                                                                                                                                                                          |
| 10. Was the adverse event confirmed by any objective evidence?                                                 | +1  | 0  | 0           | 1     |                                                                                                                                                                          |
| Total score: 7 → Probable adverse drug reaction                                                                |     |    |             |       |                                                                                                                                                                          |

| Case 15 by: <b>Pinazo-Bandera et al</b>                                                                        | Yes | No | Do not know | Score | Comment                                                                                                                                                                                                                            |
|----------------------------------------------------------------------------------------------------------------|-----|----|-------------|-------|------------------------------------------------------------------------------------------------------------------------------------------------------------------------------------------------------------------------------------|
| 1. Are there previous conclusive reports on this reaction?                                                     | +1  | 0  | 0           | 1     | ≥2 published reports in which the adverse reaction has been described in detail<br>Adverse reaction appeared soon after vaccination<br>Improvement with immunomodulators<br><br>No known agent or condition that could lead to AIH |
| 2. Did the adverse event appear after the suspected drug was administered?                                     | +2  | -1 | 0           | 2     |                                                                                                                                                                                                                                    |
| 3. Did the adverse reaction improve when the drug was discontinued, or a specific antagonist was administered? | +1  | 0  | 0           | 1     |                                                                                                                                                                                                                                    |
| 4. Did the adverse reaction reappear when the drug was readministered?                                         | +2  | -1 | 0           | 0     |                                                                                                                                                                                                                                    |
| 5. Are there alternative causes (other than the drug) that could on their own have caused the reaction?        | -1  | +2 | 0           | 2     |                                                                                                                                                                                                                                    |
| 6. Did the reaction appeared when a placebo was given?                                                         | -1  | +1 | 0           | 0     |                                                                                                                                                                                                                                    |
| 7. Was the drug detected in the blood (or other body fluids) in concentrations known to be toxic?              | +1  | 0  | 0           | 0     |                                                                                                                                                                                                                                    |
| 8. Was the reaction more severe when the dose was increased, or less severe when dose decreased?               | +1  | 0  | 0           | 0     |                                                                                                                                                                                                                                    |
| 9. Did the patient have a similar reaction to the same or similar drugs in any previous exposure?              | +1  | 0  | 0           | 0     |                                                                                                                                                                                                                                    |
| 10. Was the adverse event confirmed by any objective evidence?                                                 | +1  | 0  | 0           | 1     |                                                                                                                                                                                                                                    |
| Total score: 7 → Probable adverse drug reaction                                                                |     |    |             |       |                                                                                                                                                                                                                                    |

| Case 16 by: <b>Boettler et al</b>                                                                              | Yes | No | Do not know | Score | Comment                                                                                                                                                                                                                           |
|----------------------------------------------------------------------------------------------------------------|-----|----|-------------|-------|-----------------------------------------------------------------------------------------------------------------------------------------------------------------------------------------------------------------------------------|
| 1. Are there previous conclusive reports on this reaction?                                                     | +1  | 0  | 0           | 1     | ≥2 published reports in which the adverse reaction has been described in detail<br>Adverse reaction appeared soon after vaccination<br>Improvement with corticosteroids<br><br>No known agent or condition that could lead to AIH |
| 2. Did the adverse event appear after the suspected drug was administered?                                     | +2  | -1 | 0           | 2     |                                                                                                                                                                                                                                   |
| 3. Did the adverse reaction improve when the drug was discontinued, or a specific antagonist was administered? | +1  | 0  | 0           | 1     |                                                                                                                                                                                                                                   |
| 4. Did the adverse reaction reappear when the drug was readministered?                                         | +2  | -1 | 0           | 2     |                                                                                                                                                                                                                                   |
| 5. Are there alternative causes (other than the drug) that could on their own have caused the reaction?        | -1  | +2 | 0           | 2     |                                                                                                                                                                                                                                   |
| 6. Did the reaction appeared when a placebo was given?                                                         | -1  | +1 | 0           | 0     |                                                                                                                                                                                                                                   |
| 7. Was the drug detected in the blood (or other body fluids) in concentrations known to be toxic?              | +1  | 0  | 0           | 0     |                                                                                                                                                                                                                                   |
| 8. Was the reaction more severe when the dose was increased, or less severe when dose decreased?               | +1  | 0  | 0           | 0     |                                                                                                                                                                                                                                   |
| 9. Did the patient have a similar reaction to the same or similar drugs in any previous exposure?              | +1  | 0  | 0           | 0     |                                                                                                                                                                                                                                   |
| 10. Was the adverse event confirmed by any objective evidence?                                                 | +1  | 0  | 0           | 1     |                                                                                                                                                                                                                                   |
| Total score: 9 → Definite adverse drug reaction                                                                |     |    |             |       |                                                                                                                                                                                                                                   |

| Case 17 by: <b>Kang et al</b>                                                                                  | Yes | No | Do not know | Score | Comment                                                                                                                                                                                                                           |
|----------------------------------------------------------------------------------------------------------------|-----|----|-------------|-------|-----------------------------------------------------------------------------------------------------------------------------------------------------------------------------------------------------------------------------------|
| 1. Are there previous conclusive reports on this reaction?                                                     | +1  | 0  | 0           | 1     | ≥2 published reports in which the adverse reaction has been described in detail<br>Adverse reaction appeared soon after vaccination<br>Improvement with corticosteroids<br><br>No known agent or condition that could lead to AIH |
| 2. Did the adverse event appear after the suspected drug was administered?                                     | +2  | -1 | 0           | 2     |                                                                                                                                                                                                                                   |
| 3. Did the adverse reaction improve when the drug was discontinued, or a specific antagonist was administered? | +1  | 0  | 0           | 1     |                                                                                                                                                                                                                                   |
| 4. Did the adverse reaction reappear when the drug was readministered?                                         | +2  | -1 | 0           | 0     |                                                                                                                                                                                                                                   |
| 5. Are there alternative causes (other than the drug) that could on their own have caused the reaction?        | -1  | +2 | 0           | 2     |                                                                                                                                                                                                                                   |
| 6. Did the reaction appeared when a placebo was given?                                                         | -1  | +1 | 0           | 0     |                                                                                                                                                                                                                                   |
| 7. Was the drug detected in the blood (or other body fluids) in concentrations known to be toxic?              | +1  | 0  | 0           | 0     |                                                                                                                                                                                                                                   |
| 8. Was the reaction more severe when the dose was increased, or less severe when dose decreased?               | +1  | 0  | 0           | 0     |                                                                                                                                                                                                                                   |
| 9. Did the patient have a similar reaction to the same or similar drugs in any previous exposure?              | +1  | 0  | 0           | 0     |                                                                                                                                                                                                                                   |
| 10. Was the adverse event confirmed by any objective evidence?                                                 | +1  | 0  | 0           | 1     |                                                                                                                                                                                                                                   |
| Total score: 7 → Probable adverse drug reaction                                                                |     |    |             |       |                                                                                                                                                                                                                                   |

| Case 18 by: <i>Ghorbani et al</i>                                                                              | Yes | No | Do not know | Score | Comment                                                                                                                             |
|----------------------------------------------------------------------------------------------------------------|-----|----|-------------|-------|-------------------------------------------------------------------------------------------------------------------------------------|
| 1. Are there previous conclusive reports on this reaction?                                                     | +1  | 0  | 0           | 1     | ≥2 published reports in which the adverse reaction has been described in detail<br>Adverse reaction appeared soon after vaccination |
| 2. Did the adverse event appear after the suspected drug was administered?                                     | +2  | -1 | 0           | 2     |                                                                                                                                     |
| 3. Did the adverse reaction improve when the drug was discontinued, or a specific antagonist was administered? | +1  | 0  | 0           | 0     | No known agent or condition that could lead to AIH                                                                                  |
| 4. Did the adverse reaction reappear when the drug was readministered?                                         | +2  | -1 | 0           | 0     |                                                                                                                                     |
| 5. Are there alternative causes (other than the drug) that could on their own have caused the reaction?        | -1  | +2 | 0           | 2     |                                                                                                                                     |
| 6. Did the reaction appeared when a placebo was given?                                                         | -1  | +1 | 0           | 0     |                                                                                                                                     |
| 7. Was the drug detected in the blood (or other body fluids) in concentrations known to be toxic?              | +1  | 0  | 0           | 0     |                                                                                                                                     |
| 8. Was the reaction more severe when the dose was increased, or less severe when dose decreased?               | +1  | 0  | 0           | 0     |                                                                                                                                     |
| 9. Did the patient have a similar reaction to the same or similar drugs in any previous exposure?              | +1  | 0  | 0           | 0     |                                                                                                                                     |
| 10. Was the adverse event confirmed by any objective evidence?                                                 | +1  | 0  | 0           | 1     |                                                                                                                                     |
| Total score: 6 → Probable adverse drug reaction                                                                |     |    |             |       |                                                                                                                                     |

| Case 19 by: <b>Fimiano et al</b>                                                                               | Yes | No | Do not know | Score | Comment                                                                                                                                                                                                                       |
|----------------------------------------------------------------------------------------------------------------|-----|----|-------------|-------|-------------------------------------------------------------------------------------------------------------------------------------------------------------------------------------------------------------------------------|
| 1. Are there previous conclusive reports on this reaction?                                                     | +1  | 0  | 0           | 1     | ≥2 published reports in which the adverse reaction has been described in detail<br>Adverse reaction appeared soon after vaccination<br>Improvement with corticosteroids<br>No known agent or condition that could lead to AIH |
| 2. Did the adverse event appear after the suspected drug was administered?                                     | +2  | -1 | 0           | 2     |                                                                                                                                                                                                                               |
| 3. Did the adverse reaction improve when the drug was discontinued, or a specific antagonist was administered? | +1  | 0  | 0           | 1     |                                                                                                                                                                                                                               |
| 4. Did the adverse reaction reappear when the drug was readministered?                                         | +2  | -1 | 0           | 0     |                                                                                                                                                                                                                               |
| 5. Are there alternative causes (other than the drug) that could on their own have caused the reaction?        | -1  | +2 | 0           | 2     |                                                                                                                                                                                                                               |
| 6. Did the reaction appeared when a placebo was given?                                                         | -1  | +1 | 0           | 0     |                                                                                                                                                                                                                               |
| 7. Was the drug detected in the blood (or other body fluids) in concentrations known to be toxic?              | +1  | 0  | 0           | 0     |                                                                                                                                                                                                                               |
| 8. Was the reaction more severe when the dose was increased, or less severe when dose decreased?               | +1  | 0  | 0           | 0     |                                                                                                                                                                                                                               |
| 9. Did the patient have a similar reaction to the same or similar drugs in any previous exposure?              | +1  | 0  | 0           | 0     |                                                                                                                                                                                                                               |
| 10. Was the adverse event confirmed by any objective evidence?                                                 | +1  | 0  | 0           | 1     |                                                                                                                                                                                                                               |
| Total score: 7 → Probable adverse drug reaction                                                                |     |    |             |       |                                                                                                                                                                                                                               |

| Case 20 by: <i>Camacho-Dominguez et al</i>                                                                     | Yes | No | Do not know | Score | Comment                                                                                                                                                                                                                       |
|----------------------------------------------------------------------------------------------------------------|-----|----|-------------|-------|-------------------------------------------------------------------------------------------------------------------------------------------------------------------------------------------------------------------------------|
| 1. Are there previous conclusive reports on this reaction?                                                     | +1  | 0  | 0           | 1     | ≥2 published reports in which the adverse reaction has been described in detail<br>Adverse reaction appeared soon after vaccination<br>Improvement with corticosteroids<br>No known agent or condition that could lead to AIH |
| 2. Did the adverse event appear after the suspected drug was administered?                                     | +2  | -1 | 0           | 2     |                                                                                                                                                                                                                               |
| 3. Did the adverse reaction improve when the drug was discontinued, or a specific antagonist was administered? | +1  | 0  | 0           | 1     |                                                                                                                                                                                                                               |
| 4. Did the adverse reaction reappear when the drug was readministered?                                         | +2  | -1 | 0           | 0     |                                                                                                                                                                                                                               |
| 5. Are there alternative causes (other than the drug) that could on their own have caused the reaction?        | -1  | +2 | 0           | 2     |                                                                                                                                                                                                                               |
| 6. Did the reaction appeared when a placebo was given?                                                         | -1  | +1 | 0           | 0     |                                                                                                                                                                                                                               |
| 7. Was the drug detected in the blood (or other body fluids) in concentrations known to be toxic?              | +1  | 0  | 0           | 0     |                                                                                                                                                                                                                               |
| 8. Was the reaction more severe when the dose was increased, or less severe when dose decreased?               | +1  | 0  | 0           | 0     |                                                                                                                                                                                                                               |
| 9. Did the patient have a similar reaction to the same or similar drugs in any previous exposure?              | +1  | 0  | 0           | 0     |                                                                                                                                                                                                                               |
| 10. Was the adverse event confirmed by any objective evidence?                                                 | +1  | 0  | 0           | 1     |                                                                                                                                                                                                                               |
| Total score: 7 → Probable adverse drug reaction                                                                |     |    |             |       |                                                                                                                                                                                                                               |

| Cases 21,22 by: <b>Erard et al</b>                                                                             | Yes | No | Do not know | Score | Comment                                                                                                                                                                                                                       |
|----------------------------------------------------------------------------------------------------------------|-----|----|-------------|-------|-------------------------------------------------------------------------------------------------------------------------------------------------------------------------------------------------------------------------------|
| 1. Are there previous conclusive reports on this reaction?                                                     | +1  | 0  | 0           | 1     | ≥2 published reports in which the adverse reaction has been described in detail<br>Adverse reaction appeared soon after vaccination<br>Improvement with corticosteroids<br>No known agent or condition that could lead to AIH |
| 2. Did the adverse event appear after the suspected drug was administered?                                     | +2  | -1 | 0           | 2     |                                                                                                                                                                                                                               |
| 3. Did the adverse reaction improve when the drug was discontinued, or a specific antagonist was administered? | +1  | 0  | 0           | 1     |                                                                                                                                                                                                                               |
| 4. Did the adverse reaction reappear when the drug was readministered?                                         | +2  | -1 | 0           | 0     |                                                                                                                                                                                                                               |
| 5. Are there alternative causes (other than the drug) that could on their own have caused the reaction?        | -1  | +2 | 0           | 2     |                                                                                                                                                                                                                               |
| 6. Did the reaction appeared when a placebo was given?                                                         | -1  | +1 | 0           | 0     |                                                                                                                                                                                                                               |
| 7. Was the drug detected in the blood (or other body fluids) in concentrations known to be toxic?              | +1  | 0  | 0           | 0     |                                                                                                                                                                                                                               |
| 8. Was the reaction more severe when the dose was increased, or less severe when dose decreased?               | +1  | 0  | 0           | 0     |                                                                                                                                                                                                                               |
| 9. Did the patient have a similar reaction to the same or similar drugs in any previous exposure?              | +1  | 0  | 0           | 0     |                                                                                                                                                                                                                               |
| 10. Was the adverse event confirmed by any objective evidence?                                                 | +1  | 0  | 0           | 1     |                                                                                                                                                                                                                               |
| Total score: 7 → Probable adverse drug reaction                                                                |     |    |             |       |                                                                                                                                                                                                                               |

| Case 23 by: <i>Erard et al</i>                                                                                 | Yes | No | Do not know | Score | Comment                                                                                                                                                                                                                           |
|----------------------------------------------------------------------------------------------------------------|-----|----|-------------|-------|-----------------------------------------------------------------------------------------------------------------------------------------------------------------------------------------------------------------------------------|
| 1. Are there previous conclusive reports on this reaction?                                                     | +1  | 0  | 0           | 1     | ≥2 published reports in which the adverse reaction has been described in detail<br>Adverse reaction appeared soon after vaccination<br>No improvement with immunomodulators<br>No known agent or condition that could lead to AIH |
| 2. Did the adverse event appear after the suspected drug was administered?                                     | +2  | -1 | 0           | 2     |                                                                                                                                                                                                                                   |
| 3. Did the adverse reaction improve when the drug was discontinued, or a specific antagonist was administered? | +1  | 0  | 0           | 0     |                                                                                                                                                                                                                                   |
| 4. Did the adverse reaction reappear when the drug was readministered?                                         | +2  | -1 | 0           | 0     |                                                                                                                                                                                                                                   |
| 5. Are there alternative causes (other than the drug) that could on their own have caused the reaction?        | -1  | +2 | 0           | 2     |                                                                                                                                                                                                                                   |
| 6. Did the reaction appeared when a placebo was given?                                                         | -1  | +1 | 0           | 0     |                                                                                                                                                                                                                                   |
| 7. Was the drug detected in the blood (or other body fluids) in concentrations known to be toxic?              | +1  | 0  | 0           | 0     |                                                                                                                                                                                                                                   |
| 8. Was the reaction more severe when the dose was increased, or less severe when dose decreased?               | +1  | 0  | 0           | 0     |                                                                                                                                                                                                                                   |
| 9. Did the patient have a similar reaction to the same or similar drugs in any previous exposure?              | +1  | 0  | 0           | 0     |                                                                                                                                                                                                                                   |
| 10. Was the adverse event confirmed by any objective evidence?                                                 | +1  | 0  | 0           | 1     |                                                                                                                                                                                                                                   |
| Total score: 6 → Probable adverse drug reaction                                                                |     |    |             |       |                                                                                                                                                                                                                                   |

| Cases 24, 25, 26 by: <b>Suzuki et al</b>                                                                       | Yes | No | Do not know | Score | Comment                                                                                                                                                                |
|----------------------------------------------------------------------------------------------------------------|-----|----|-------------|-------|------------------------------------------------------------------------------------------------------------------------------------------------------------------------|
| 1. Are there previous conclusive reports on this reaction?                                                     | +1  | 0  | 0           | 1     | ≥2 published reports in which the adverse reaction has been described in detail<br>Adverse reaction appeared soon after vaccination<br>Resolution with corticosteroids |
| 2. Did the adverse event appear after the suspected drug was administered?                                     | +2  | -1 | 0           | 2     |                                                                                                                                                                        |
| 3. Did the adverse reaction improve when the drug was discontinued, or a specific antagonist was administered? | +1  | 0  | 0           | 1     |                                                                                                                                                                        |
| 4. Did the adverse reaction reappear when the drug was readministered?                                         | +2  | -1 | 0           | 0     | No known agent or condition that could lead to AIH                                                                                                                     |
| 5. Are there alternative causes (other than the drug) that could on their own have caused the reaction?        | -1  | +2 | 0           | 2     |                                                                                                                                                                        |
| 6. Did the reaction appeared when a placebo was given?                                                         | -1  | +1 | 0           | 0     |                                                                                                                                                                        |
| 7. Was the drug detected in the blood (or other body fluids) in concentrations known to be toxic?              | +1  | 0  | 0           | 0     | Biopsy compatible with AIH                                                                                                                                             |
| 8. Was the reaction more severe when the dose was increased, or less severe when dose decreased?               | +1  | 0  | 0           | 0     |                                                                                                                                                                        |
| 9. Did the patient have a similar reaction to the same or similar drugs in any previous exposure?              | +1  | 0  | 0           | 0     |                                                                                                                                                                        |
| 10. Was the adverse event confirmed by any objective evidence?                                                 | +1  | 0  | 0           | 1     |                                                                                                                                                                        |
| Total score: 7 → Probable adverse drug reaction                                                                |     |    |             |       |                                                                                                                                                                        |

| Case 27 by: <b>Cao et al</b>                                                                                   | Yes | No | Do not know | Score | Comment                                                                                                                                                                |
|----------------------------------------------------------------------------------------------------------------|-----|----|-------------|-------|------------------------------------------------------------------------------------------------------------------------------------------------------------------------|
| 1. Are there previous conclusive reports on this reaction?                                                     | +1  | 0  | 0           | 1     | ≥2 published reports in which the adverse reaction has been described in detail<br>Adverse reaction appeared soon after vaccination<br>Resolution with corticosteroids |
| 2. Did the adverse event appear after the suspected drug was administered?                                     | +2  | -1 | 0           | 2     |                                                                                                                                                                        |
| 3. Did the adverse reaction improve when the drug was discontinued, or a specific antagonist was administered? | +1  | 0  | 0           | 1     |                                                                                                                                                                        |
| 4. Did the adverse reaction reappear when the drug was readministered?                                         | +2  | -1 | 0           | 0     | No known agent or condition that could lead to AIH                                                                                                                     |
| 5. Are there alternative causes (other than the drug) that could on their own have caused the reaction?        | -1  | +2 | 0           | 2     |                                                                                                                                                                        |
| 6. Did the reaction appeared when a placebo was given?                                                         | -1  | +1 | 0           | 0     |                                                                                                                                                                        |
| 7. Was the drug detected in the blood (or other body fluids) in concentrations known to be toxic?              | +1  | 0  | 0           | 0     | Biopsy compatible with AIH                                                                                                                                             |
| 8. Was the reaction more severe when the dose was increased, or less severe when dose decreased?               | +1  | 0  | 0           | 0     |                                                                                                                                                                        |
| 9. Did the patient have a similar reaction to the same or similar drugs in any previous exposure?              | +1  | 0  | 0           | 0     |                                                                                                                                                                        |
| 10. Was the adverse event confirmed by any objective evidence?                                                 | +1  | 0  | 0           | 1     |                                                                                                                                                                        |
| Total score: 7 → Probable adverse drug reaction                                                                |     |    |             |       |                                                                                                                                                                        |

| Case 28 by: <b>Avci et al</b>                                                                                  | Yes | No | Do not know | Score | Comment                                                                                                                                                                |
|----------------------------------------------------------------------------------------------------------------|-----|----|-------------|-------|------------------------------------------------------------------------------------------------------------------------------------------------------------------------|
| 1. Are there previous conclusive reports on this reaction?                                                     | +1  | 0  | 0           | 1     | ≥2 published reports in which the adverse reaction has been described in detail<br>Adverse reaction appeared soon after vaccination<br>Resolution with corticosteroids |
| 2. Did the adverse event appear after the suspected drug was administered?                                     | +2  | -1 | 0           | 2     |                                                                                                                                                                        |
| 3. Did the adverse reaction improve when the drug was discontinued, or a specific antagonist was administered? | +1  | 0  | 0           | 1     |                                                                                                                                                                        |
| 4. Did the adverse reaction reappear when the drug was readministered?                                         | +2  | -1 | 0           | 0     | No known agent or condition that could lead to AIH                                                                                                                     |
| 5. Are there alternative causes (other than the drug) that could on their own have caused the reaction?        | -1  | +2 | 0           | 2     |                                                                                                                                                                        |
| 6. Did the reaction appeared when a placebo was given?                                                         | -1  | +1 | 0           | 0     |                                                                                                                                                                        |
| 7. Was the drug detected in the blood (or other body fluids) in concentrations known to be toxic?              | +1  | 0  | 0           | 0     | Biopsy compatible with AIH                                                                                                                                             |
| 8. Was the reaction more severe when the dose was increased, or less severe when dose decreased?               | +1  | 0  | 0           | 0     |                                                                                                                                                                        |
| 9. Did the patient have a similar reaction to the same or similar drugs in any previous exposure?              | +1  | 0  | 0           | 0     |                                                                                                                                                                        |
| 10. Was the adverse event confirmed by any objective evidence?                                                 | +1  | 0  | 0           | 1     |                                                                                                                                                                        |
| Total score: 7 → Probable adverse drug reaction                                                                |     |    |             |       |                                                                                                                                                                        |

| Case 29 by: <b>Garrido et al</b>                                                                               | Yes | No | Do not know | Score | Comment                                                                                                                                                                |
|----------------------------------------------------------------------------------------------------------------|-----|----|-------------|-------|------------------------------------------------------------------------------------------------------------------------------------------------------------------------|
| 1. Are there previous conclusive reports on this reaction?                                                     | +1  | 0  | 0           | 1     | ≥2 published reports in which the adverse reaction has been described in detail<br>Adverse reaction appeared soon after vaccination<br>Resolution with corticosteroids |
| 2. Did the adverse event appear after the suspected drug was administered?                                     | +2  | -1 | 0           | 2     |                                                                                                                                                                        |
| 3. Did the adverse reaction improve when the drug was discontinued, or a specific antagonist was administered? | +1  | 0  | 0           | 1     |                                                                                                                                                                        |
| 4. Did the adverse reaction reappear when the drug was readministered?                                         | +2  | -1 | 0           | 0     | No known agent or condition that could lead to AIH                                                                                                                     |
| 5. Are there alternative causes (other than the drug) that could on their own have caused the reaction?        | -1  | +2 | 0           | 2     |                                                                                                                                                                        |
| 6. Did the reaction appeared when a placebo was given?                                                         | -1  | +1 | 0           | 0     |                                                                                                                                                                        |
| 7. Was the drug detected in the blood (or other body fluids) in concentrations known to be toxic?              | +1  | 0  | 0           | 0     | Biopsy compatible with AIH                                                                                                                                             |
| 8. Was the reaction more severe when the dose was increased, or less severe when dose decreased?               | +1  | 0  | 0           | 0     |                                                                                                                                                                        |
| 9. Did the patient have a similar reaction to the same or similar drugs in any previous exposure?              | +1  | 0  | 0           | 0     |                                                                                                                                                                        |
| 10. Was the adverse event confirmed by any objective evidence?                                                 | +1  | 0  | 0           | 1     |                                                                                                                                                                        |
| Total score: 7 → Probable adverse drug reaction                                                                |     |    |             |       |                                                                                                                                                                        |

| Case 30 by: <b>Palla et al</b>                                                                                 | Yes | No | Do not know | Score | Comment                                                                                                                                                                |
|----------------------------------------------------------------------------------------------------------------|-----|----|-------------|-------|------------------------------------------------------------------------------------------------------------------------------------------------------------------------|
| 1. Are there previous conclusive reports on this reaction?                                                     | +1  | 0  | 0           | 1     | ≥2 published reports in which the adverse reaction has been described in detail<br>Adverse reaction appeared soon after vaccination<br>Resolution with corticosteroids |
| 2. Did the adverse event appear after the suspected drug was administered?                                     | +2  | -1 | 0           | 2     |                                                                                                                                                                        |
| 3. Did the adverse reaction improve when the drug was discontinued, or a specific antagonist was administered? | +1  | 0  | 0           | 1     |                                                                                                                                                                        |
| 4. Did the adverse reaction reappear when the drug was readministered?                                         | +2  | -1 | 0           | 0     | No known agent or condition that could lead to AIH                                                                                                                     |
| 5. Are there alternative causes (other than the drug) that could on their own have caused the reaction?        | -1  | +2 | 0           | 2     |                                                                                                                                                                        |
| 6. Did the reaction appeared when a placebo was given?                                                         | -1  | +1 | 0           | 0     |                                                                                                                                                                        |
| 7. Was the drug detected in the blood (or other body fluids) in concentrations known to be toxic?              | +1  | 0  | 0           | 0     | Biopsy compatible with AIH                                                                                                                                             |
| 8. Was the reaction more severe when the dose was increased, or less severe when dose decreased?               | +1  | 0  | 0           | 0     |                                                                                                                                                                        |
| 9. Did the patient have a similar reaction to the same or similar drugs in any previous exposure?              | +1  | 0  | 0           | 0     |                                                                                                                                                                        |
| 10. Was the adverse event confirmed by any objective evidence?                                                 | +1  | 0  | 0           | 1     |                                                                                                                                                                        |
| Total score: 7 → Probable adverse drug reaction                                                                |     |    |             |       |                                                                                                                                                                        |

| Case 31 by: <b>Zhou et al</b>                                                                                  | Yes | No | Do not know | Score | Comment                                                                                                                                                                |
|----------------------------------------------------------------------------------------------------------------|-----|----|-------------|-------|------------------------------------------------------------------------------------------------------------------------------------------------------------------------|
| 1. Are there previous conclusive reports on this reaction?                                                     | +1  | 0  | 0           | 1     | ≥2 published reports in which the adverse reaction has been described in detail<br>Adverse reaction appeared soon after vaccination<br>Resolution with corticosteroids |
| 2. Did the adverse event appear after the suspected drug was administered?                                     | +2  | -1 | 0           | 2     |                                                                                                                                                                        |
| 3. Did the adverse reaction improve when the drug was discontinued, or a specific antagonist was administered? | +1  | 0  | 0           | 1     |                                                                                                                                                                        |
| 4. Did the adverse reaction reappear when the drug was readministered?                                         | +2  | -1 | 0           | 0     | Patient had a diagnosis of primary sclerosing cholangitis (PSC). However, she was on remission under continuous monitoring and flare of PSC is considered unlikely.    |
| 5. Are there alternative causes (other than the drug) that could on their own have caused the reaction?        | -1  | +2 | 0           | 2     |                                                                                                                                                                        |
| 6. Did the reaction appeared when a placebo was given?                                                         | -1  | +1 | 0           | 0     |                                                                                                                                                                        |
| 7. Was the drug detected in the blood (or other body fluids) in concentrations known to be toxic?              | +1  | 0  | 0           | 0     | Biopsy compatible with AIH                                                                                                                                             |
| 8. Was the reaction more severe when the dose was increased, or less severe when dose decreased?               | +1  | 0  | 0           | 0     |                                                                                                                                                                        |
| 9. Did the patient have a similar reaction to the same or similar drugs in any previous exposure?              | +1  | 0  | 0           | 0     |                                                                                                                                                                        |
| 10. Was the adverse event confirmed by any objective evidence?                                                 | +1  | 0  | 0           | 1     |                                                                                                                                                                        |
| Total score: 7 → Probable adverse drug reaction                                                                |     |    |             |       |                                                                                                                                                                        |

| Case 32 by: <b>Ghielmetti et al</b>                                                                            | Yes | No | Do not know | Score | Comment                                                                                                                                                                |
|----------------------------------------------------------------------------------------------------------------|-----|----|-------------|-------|------------------------------------------------------------------------------------------------------------------------------------------------------------------------|
| 1. Are there previous conclusive reports on this reaction?                                                     | +1  | 0  | 0           | 1     | ≥2 published reports in which the adverse reaction has been described in detail<br>Adverse reaction appeared soon after vaccination<br>Resolution with corticosteroids |
| 2. Did the adverse event appear after the suspected drug was administered?                                     | +2  | -1 | 0           | 2     |                                                                                                                                                                        |
| 3. Did the adverse reaction improve when the drug was discontinued, or a specific antagonist was administered? | +1  | 0  | 0           | 1     |                                                                                                                                                                        |
| 4. Did the adverse reaction reappear when the drug was readministered?                                         | +2  | -1 | 0           | 0     | No known agent or condition that could lead to AIH                                                                                                                     |
| 5. Are there alternative causes (other than the drug) that could on their own have caused the reaction?        | -1  | +2 | 0           | 2     |                                                                                                                                                                        |
| 6. Did the reaction appeared when a placebo was given?                                                         | -1  | +1 | 0           | 0     |                                                                                                                                                                        |
| 7. Was the drug detected in the blood (or other body fluids) in concentrations known to be toxic?              | +1  | 0  | 0           | 0     | Biopsy compatible with AIH                                                                                                                                             |
| 8. Was the reaction more severe when the dose was increased, or less severe when dose decreased?               | +1  | 0  | 0           | 0     |                                                                                                                                                                        |
| 9. Did the patient have a similar reaction to the same or similar drugs in any previous exposure?              | +1  | 0  | 0           | 0     |                                                                                                                                                                        |
| 10. Was the adverse event confirmed by any objective evidence?                                                 | +1  | 0  | 0           | 1     |                                                                                                                                                                        |
| Total score: 7 → Probable adverse drug reaction                                                                |     |    |             |       |                                                                                                                                                                        |

| Case 33 by: <b>McShane et al</b>                                                                               | Yes | No | Do not know | Score | Comment                                                                                                                                                                |
|----------------------------------------------------------------------------------------------------------------|-----|----|-------------|-------|------------------------------------------------------------------------------------------------------------------------------------------------------------------------|
| 1. Are there previous conclusive reports on this reaction?                                                     | +1  | 0  | 0           | 1     | ≥2 published reports in which the adverse reaction has been described in detail<br>Adverse reaction appeared soon after vaccination<br>Resolution with corticosteroids |
| 2. Did the adverse event appear after the suspected drug was administered?                                     | +2  | -1 | 0           | 2     |                                                                                                                                                                        |
| 3. Did the adverse reaction improve when the drug was discontinued, or a specific antagonist was administered? | +1  | 0  | 0           | 1     |                                                                                                                                                                        |
| 4. Did the adverse reaction reappear when the drug was readministered?                                         | +2  | -1 | 0           | 0     | No known agent or condition that could lead to AIH                                                                                                                     |
| 5. Are there alternative causes (other than the drug) that could on their own have caused the reaction?        | -1  | +2 | 0           | 2     |                                                                                                                                                                        |
| 6. Did the reaction appeared when a placebo was given?                                                         | -1  | +1 | 0           | 0     |                                                                                                                                                                        |
| 7. Was the drug detected in the blood (or other body fluids) in concentrations known to be toxic?              | +1  | 0  | 0           | 0     | Biopsy compatible with AIH                                                                                                                                             |
| 8. Was the reaction more severe when the dose was increased, or less severe when dose decreased?               | +1  | 0  | 0           | 0     |                                                                                                                                                                        |
| 9. Did the patient have a similar reaction to the same or similar drugs in any previous exposure?              | +1  | 0  | 0           | 0     |                                                                                                                                                                        |
| 10. Was the adverse event confirmed by any objective evidence?                                                 | +1  | 0  | 0           | 1     |                                                                                                                                                                        |
| Total score: 7 → Probable adverse drug reaction                                                                |     |    |             |       |                                                                                                                                                                        |

| Case 34 by: <b>Clayton-Chubb et al</b>                                                                         | Yes | No | Do not know | Score | Comment                                                                                                                                                                |
|----------------------------------------------------------------------------------------------------------------|-----|----|-------------|-------|------------------------------------------------------------------------------------------------------------------------------------------------------------------------|
| 1. Are there previous conclusive reports on this reaction?                                                     | +1  | 0  | 0           | 1     | ≥2 published reports in which the adverse reaction has been described in detail<br>Adverse reaction appeared soon after vaccination<br>Resolution with corticosteroids |
| 2. Did the adverse event appear after the suspected drug was administered?                                     | +2  | -1 | 0           | 2     |                                                                                                                                                                        |
| 3. Did the adverse reaction improve when the drug was discontinued, or a specific antagonist was administered? | +1  | 0  | 0           | 1     |                                                                                                                                                                        |
| 4. Did the adverse reaction reappear when the drug was readministered?                                         | +2  | -1 | 0           | 0     | No known agent or condition that could lead to AIH                                                                                                                     |
| 5. Are there alternative causes (other than the drug) that could on their own have caused the reaction?        | -1  | +2 | 0           | 2     |                                                                                                                                                                        |
| 6. Did the reaction appeared when a placebo was given?                                                         | -1  | +1 | 0           | 0     |                                                                                                                                                                        |
| 7. Was the drug detected in the blood (or other body fluids) in concentrations known to be toxic?              | +1  | 0  | 0           | 0     |                                                                                                                                                                        |
| 8. Was the reaction more severe when the dose was increased, or less severe when dose decreased?               | +1  | 0  | 0           | 0     |                                                                                                                                                                        |
| 9. Did the patient have a similar reaction to the same or similar drugs in any previous exposure?              | +1  | 0  | 0           | 0     |                                                                                                                                                                        |
| 10. Was the adverse event confirmed by any objective evidence?                                                 | +1  | 0  | 0           | 1     | Biopsy compatible with AIH                                                                                                                                             |
| Total score: 7 → Probable adverse drug reaction                                                                |     |    |             |       |                                                                                                                                                                        |

| Case 35 by: <b>Tan et al</b>                                                                                   | Yes | No | Do not know | Score | Comment                                                                                                                                                                |
|----------------------------------------------------------------------------------------------------------------|-----|----|-------------|-------|------------------------------------------------------------------------------------------------------------------------------------------------------------------------|
| 1. Are there previous conclusive reports on this reaction?                                                     | +1  | 0  | 0           | 1     | ≥2 published reports in which the adverse reaction has been described in detail<br>Adverse reaction appeared soon after vaccination<br>Resolution with corticosteroids |
| 2. Did the adverse event appear after the suspected drug was administered?                                     | +2  | -1 | 0           | 2     |                                                                                                                                                                        |
| 3. Did the adverse reaction improve when the drug was discontinued, or a specific antagonist was administered? | +1  | 0  | 0           | 1     |                                                                                                                                                                        |
| 4. Did the adverse reaction reappear when the drug was readministered?                                         | +2  | -1 | 0           | 0     | No known agent or condition that could lead to AIH                                                                                                                     |
| 5. Are there alternative causes (other than the drug) that could on their own have caused the reaction?        | -1  | +2 | 0           | 2     |                                                                                                                                                                        |
| 6. Did the reaction appeared when a placebo was given?                                                         | -1  | +1 | 0           | 0     |                                                                                                                                                                        |
| 7. Was the drug detected in the blood (or other body fluids) in concentrations known to be toxic?              | +1  | 0  | 0           | 0     |                                                                                                                                                                        |
| 8. Was the reaction more severe when the dose was increased, or less severe when dose decreased?               | +1  | 0  | 0           | 0     |                                                                                                                                                                        |
| 9. Did the patient have a similar reaction to the same or similar drugs in any previous exposure?              | +1  | 0  | 0           | 0     |                                                                                                                                                                        |
| 10. Was the adverse event confirmed by any objective evidence?                                                 | +1  | 0  | 0           | 1     | Biopsy compatible with AIH                                                                                                                                             |
| Total score: 7 → Probable adverse drug reaction                                                                |     |    |             |       |                                                                                                                                                                        |

| Case 36 by: <b>Rocco et al</b>                                                                                 | Yes | No | Do not know | Score | Comment                                                                                                                                                                 |
|----------------------------------------------------------------------------------------------------------------|-----|----|-------------|-------|-------------------------------------------------------------------------------------------------------------------------------------------------------------------------|
| 1. Are there previous conclusive reports on this reaction?                                                     | +1  | 0  | 0           | 1     | ≥2 published reports in which the adverse reaction has been described in detail<br>Adverse reaction appeared soon after vaccination<br>Improvement with corticosteroids |
| 2. Did the adverse event appear after the suspected drug was administered?                                     | +2  | -1 | 0           | 2     |                                                                                                                                                                         |
| 3. Did the adverse reaction improve when the drug was discontinued, or a specific antagonist was administered? | +1  | 0  | 0           | 1     |                                                                                                                                                                         |
| 4. Did the adverse reaction reappear when the drug was readministered?                                         | +2  | -1 | 0           | 0     | No known agent or condition that could lead to AIH                                                                                                                      |
| 5. Are there alternative causes (other than the drug) that could on their own have caused the reaction?        | -1  | +2 | 0           | 2     |                                                                                                                                                                         |
| 6. Did the reaction appeared when a placebo was given?                                                         | -1  | +1 | 0           | 0     |                                                                                                                                                                         |
| 7. Was the drug detected in the blood (or other body fluids) in concentrations known to be toxic?              | +1  | 0  | 0           | 0     |                                                                                                                                                                         |
| 8. Was the reaction more severe when the dose was increased, or less severe when dose decreased?               | +1  | 0  | 0           | 0     |                                                                                                                                                                         |
| 9. Did the patient have a similar reaction to the same or similar drugs in any previous exposure?              | +1  | 0  | 0           | 0     |                                                                                                                                                                         |
| 10. Was the adverse event confirmed by any objective evidence?                                                 | +1  | 0  | 0           | 1     | Biopsy compatible with AIH                                                                                                                                              |
| Total score: 7 → Probable adverse drug reaction                                                                |     |    |             |       |                                                                                                                                                                         |

| Case 37 by: <b>Bril et al</b>                                                                                  | Yes | No | Do not know | Score | Comment                                                                                                                                                                 |
|----------------------------------------------------------------------------------------------------------------|-----|----|-------------|-------|-------------------------------------------------------------------------------------------------------------------------------------------------------------------------|
| 1. Are there previous conclusive reports on this reaction?                                                     | +1  | 0  | 0           | 1     | ≥2 published reports in which the adverse reaction has been described in detail<br>Adverse reaction appeared soon after vaccination<br>Improvement with corticosteroids |
| 2. Did the adverse event appear after the suspected drug was administered?                                     | +2  | -1 | 0           | 2     |                                                                                                                                                                         |
| 3. Did the adverse reaction improve when the drug was discontinued, or a specific antagonist was administered? | +1  | 0  | 0           | 1     |                                                                                                                                                                         |
| 4. Did the adverse reaction reappear when the drug was readministered?                                         | +2  | -1 | 0           | 0     | No known agent or condition that could lead to AIH                                                                                                                      |
| 5. Are there alternative causes (other than the drug) that could on their own have caused the reaction?        | -1  | +2 | 0           | 2     |                                                                                                                                                                         |
| 6. Did the reaction appeared when a placebo was given?                                                         | -1  | +1 | 0           | 0     |                                                                                                                                                                         |
| 7. Was the drug detected in the blood (or other body fluids) in concentrations known to be toxic?              | +1  | 0  | 0           | 0     |                                                                                                                                                                         |
| 8. Was the reaction more severe when the dose was increased, or less severe when dose decreased?               | +1  | 0  | 0           | 0     |                                                                                                                                                                         |
| 9. Did the patient have a similar reaction to the same or similar drugs in any previous exposure?              | +1  | 0  | 0           | 0     |                                                                                                                                                                         |
| 10. Was the adverse event confirmed by any objective evidence?                                                 | +1  | 0  | 0           | 1     | Biopsy compatible with AIH                                                                                                                                              |
| Total score: 7 → Probable adverse drug reaction                                                                |     |    |             |       |                                                                                                                                                                         |



| Case 38 by: <b>Goulas et al</b>                                                                                | Yes | No | Do not know | Score | Comment                                                                         |
|----------------------------------------------------------------------------------------------------------------|-----|----|-------------|-------|---------------------------------------------------------------------------------|
| 1. Are there previous conclusive reports on this reaction?                                                     | +1  | 0  | 0           | 1     | ≥2 published reports in which the adverse reaction has been described in detail |
| 2. Did the adverse event appear after the suspected drug was administered?                                     | +2  | -1 | 0           | 2     |                                                                                 |
| 3. Did the adverse reaction improve when the drug was discontinued, or a specific antagonist was administered? | +1  | 0  | 0           | 1     | Adverse reaction appeared soon after vaccination                                |
| 4. Did the adverse reaction reappear when the drug was readministered?                                         | +2  | -1 | 0           | 0     | Improvement with corticosteroids                                                |
| 5. Are there alternative causes (other than the drug) that could on their own have caused the reaction?        | -1  | +2 | 0           | 2     | No known agent or condition that could lead to AIH                              |
| 6. Did the reaction appeared when a placebo was given?                                                         | -1  | +1 | 0           | 0     |                                                                                 |
| 7. Was the drug detected in the blood (or other body fluids) in concentrations known to be toxic?              | +1  | 0  | 0           | 0     |                                                                                 |
| 8. Was the reaction more severe when the dose was increased, or less severe when dose decreased?               | +1  | 0  | 0           | 0     |                                                                                 |
| 9. Did the patient have a similar reaction to the same or similar drugs in any previous exposure?              | +1  | 0  | 0           | 0     |                                                                                 |
| 10. Was the adverse event confirmed by any objective evidence?                                                 | +1  | 0  | 0           | 1     | Biopsy compatible with AIH                                                      |
| Total score: 7 → Probable adverse drug reaction                                                                |     |    |             |       |                                                                                 |

| Case 39 by: <b>Lodato et al</b>                                                                                | Yes | No | Do not know | Score | Comment                                                                         |
|----------------------------------------------------------------------------------------------------------------|-----|----|-------------|-------|---------------------------------------------------------------------------------|
| 1. Are there previous conclusive reports on this reaction?                                                     | +1  | 0  | 0           | 1     | ≥2 published reports in which the adverse reaction has been described in detail |
| 2. Did the adverse event appear after the suspected drug was administered?                                     | +2  | -1 | 0           | 2     |                                                                                 |
| 3. Did the adverse reaction improve when the drug was discontinued, or a specific antagonist was administered? | +1  | 0  | 0           | 1     | Adverse reaction appeared soon after vaccination                                |
| 4. Did the adverse reaction reappear when the drug was readministered?                                         | +2  | -1 | 0           | 0     | Resolution with corticosteroids                                                 |
| 5. Are there alternative causes (other than the drug) that could on their own have caused the reaction?        | -1  | +2 | 0           | 2     | No known agent or condition that could lead to AIH                              |
| 6. Did the reaction appeared when a placebo was given?                                                         | -1  | +1 | 0           | 0     |                                                                                 |
| 7. Was the drug detected in the blood (or other body fluids) in concentrations known to be toxic?              | +1  | 0  | 0           | 0     |                                                                                 |
| 8. Was the reaction more severe when the dose was increased, or less severe when dose decreased?               | +1  | 0  | 0           | 0     |                                                                                 |
| 9. Did the patient have a similar reaction to the same or similar drugs in any previous exposure?              | +1  | 0  | 0           | 0     |                                                                                 |
| 10. Was the adverse event confirmed by any objective evidence?                                                 | +1  | 0  | 0           | 1     | Biopsy compatible with AIH                                                      |
| Total score: 7 → Probable adverse drug reaction                                                                |     |    |             |       |                                                                                 |

| Case 40 by: <b>Londono et al</b>                                                                               | Yes | No | Do not know | Score | Comment                                                                         |
|----------------------------------------------------------------------------------------------------------------|-----|----|-------------|-------|---------------------------------------------------------------------------------|
| 1. Are there previous conclusive reports on this reaction?                                                     | +1  | 0  | 0           | 1     | ≥2 published reports in which the adverse reaction has been described in detail |
| 2. Did the adverse event appear after the suspected drug was administered?                                     | +2  | -1 | 0           | 2     |                                                                                 |
| 3. Did the adverse reaction improve when the drug was discontinued, or a specific antagonist was administered? | +1  | 0  | 0           | 1     | Adverse reaction appeared soon after vaccination                                |
| 4. Did the adverse reaction reappear when the drug was readministered?                                         | +2  | -1 | 0           | 2     | Resolution with corticosteroids                                                 |
| 5. Are there alternative causes (other than the drug) that could on their own have caused the reaction?        | -1  | +2 | 0           | 2     | Precipitation of symptoms after second vaccination                              |
| 6. Did the reaction appeared when a placebo was given?                                                         | -1  | +1 | 0           | 0     |                                                                                 |
| 7. Was the drug detected in the blood (or other body fluids) in concentrations known to be toxic?              | +1  | 0  | 0           | 0     | No known agent or condition that could lead to AIH                              |
| 8. Was the reaction more severe when the dose was increased, or less severe when dose decreased?               | +1  | 0  | 0           | 0     |                                                                                 |
| 9. Did the patient have a similar reaction to the same or similar drugs in any previous exposure?              | +1  | 0  | 0           | 0     |                                                                                 |
| 10. Was the adverse event confirmed by any objective evidence?                                                 | +1  | 0  | 0           | 1     | Biopsy compatible with AIH                                                      |
| Total score: 9 → Definite adverse drug reaction                                                                |     |    |             |       |                                                                                 |

| Case 41 by: <b>Rela et al</b>                                                                                  | Yes | No | Do not know | Score | Comment                                                                         |
|----------------------------------------------------------------------------------------------------------------|-----|----|-------------|-------|---------------------------------------------------------------------------------|
| 1. Are there previous conclusive reports on this reaction?                                                     | +1  | 0  | 0           | 1     | ≥2 published reports in which the adverse reaction has been described in detail |
| 2. Did the adverse event appear after the suspected drug was administered?                                     | +2  | -1 | 0           | 2     |                                                                                 |
| 3. Did the adverse reaction improve when the drug was discontinued, or a specific antagonist was administered? | +1  | 0  | 0           | 1     | Adverse reaction appeared soon after vaccination                                |
| 4. Did the adverse reaction reappear when the drug was readministered?                                         | +2  | -1 | 0           | 0     | Resolution with corticosteroids                                                 |
| 5. Are there alternative causes (other than the drug) that could on their own have caused the reaction?        | -1  | +2 | 0           | 2     | No known agent or condition that could lead to AIH                              |
| 6. Did the reaction appeared when a placebo was given?                                                         | -1  | +1 | 0           | 0     |                                                                                 |
| 7. Was the drug detected in the blood (or other body fluids) in concentrations known to be toxic?              | +1  | 0  | 0           | 0     |                                                                                 |
| 8. Was the reaction more severe when the dose was increased, or less severe when dose decreased?               | +1  | 0  | 0           | 0     |                                                                                 |
| 9. Did the patient have a similar reaction to the same or similar drugs in any previous exposure?              | +1  | 0  | 0           | 0     |                                                                                 |
| 10. Was the adverse event confirmed by any objective evidence?                                                 | +1  | 0  | 0           | 1     | Biopsy compatible with AIH                                                      |
| Total score: 7 → Probable adverse drug reaction                                                                |     |    |             |       |                                                                                 |

| Case 42 by: <i>Rela et al</i>                                                                                  | Yes | No | Do not know | Score | Comment                                                                                                                                                                 |
|----------------------------------------------------------------------------------------------------------------|-----|----|-------------|-------|-------------------------------------------------------------------------------------------------------------------------------------------------------------------------|
| 1. Are there previous conclusive reports on this reaction?                                                     | +1  | 0  | 0           | 1     | ≥2 published reports in which the adverse reaction has been described in detail<br>Adverse reaction appeared soon after vaccination<br>Poor response to corticosteroids |
| 2. Did the adverse event appear after the suspected drug was administered?                                     | +2  | -1 | 0           | 2     |                                                                                                                                                                         |
| 3. Did the adverse reaction improve when the drug was discontinued, or a specific antagonist was administered? | +1  | 0  | 0           | 0     |                                                                                                                                                                         |
| 4. Did the adverse reaction reappear when the drug was readministered?                                         | +2  | -1 | 0           | 0     | Medical history of jaundice episodes                                                                                                                                    |
| 5. Are there alternative causes (other than the drug) that could on their own have caused the reaction?        | -1  | +2 | 0           | -1    |                                                                                                                                                                         |
| 6. Did the reaction appeared when a placebo was given?                                                         | -1  | +1 | 0           | 0     |                                                                                                                                                                         |
| 7. Was the drug detected in the blood (or other body fluids) in concentrations known to be toxic?              | +1  | 0  | 0           | 0     | Biopsy compatible with AIH                                                                                                                                              |
| 8. Was the reaction more severe when the dose was increased, or less severe when dose decreased?               | +1  | 0  | 0           | 0     |                                                                                                                                                                         |
| 9. Did the patient have a similar reaction to the same or similar drugs in any previous exposure?              | +1  | 0  | 0           | 0     |                                                                                                                                                                         |
| 10. Was the adverse event confirmed by any objective evidence?                                                 | +1  | 0  | 0           | 1     |                                                                                                                                                                         |
| Total score: 3 → Possible adverse drug reaction                                                                |     |    |             |       |                                                                                                                                                                         |

| Case 43 by: <b>Zin Tun et al</b>                                                                               | Yes | No | Do not know | Score | Comment                                                                                                                                                                |
|----------------------------------------------------------------------------------------------------------------|-----|----|-------------|-------|------------------------------------------------------------------------------------------------------------------------------------------------------------------------|
| 1. Are there previous conclusive reports on this reaction?                                                     | +1  | 0  | 0           | 1     | ≥2 published reports in which the adverse reaction has been described in detail<br>Adverse reaction appeared soon after vaccination<br>Resolution with corticosteroids |
| 2. Did the adverse event appear after the suspected drug was administered?                                     | +2  | -1 | 0           | 2     |                                                                                                                                                                        |
| 3. Did the adverse reaction improve when the drug was discontinued, or a specific antagonist was administered? | +1  | 0  | 0           | 1     |                                                                                                                                                                        |
| 4. Did the adverse reaction reappear when the drug was readministered?                                         | +2  | -1 | 0           | 2     | No known agent or condition that could lead to AIH                                                                                                                     |
| 5. Are there alternative causes (other than the drug) that could on their own have caused the reaction?        | -1  | +2 | 0           | 2     |                                                                                                                                                                        |
| 6. Did the reaction appeared when a placebo was given?                                                         | -1  | +1 | 0           | 0     |                                                                                                                                                                        |
| 7. Was the drug detected in the blood (or other body fluids) in concentrations known to be toxic?              | +1  | 0  | 0           | 0     | Biopsy compatible with AIH                                                                                                                                             |
| 8. Was the reaction more severe when the dose was increased, or less severe when dose decreased?               | +1  | 0  | 0           | 0     |                                                                                                                                                                        |
| 9. Did the patient have a similar reaction to the same or similar drugs in any previous exposure?              | +1  | 0  | 0           | 0     |                                                                                                                                                                        |
| 10. Was the adverse event confirmed by any objective evidence?                                                 | +1  | 0  | 0           | 1     |                                                                                                                                                                        |
| Total score: <b>9</b> → Probable adverse drug reaction                                                         |     |    |             |       |                                                                                                                                                                        |

| Case 44 by: Vuille-Lessard et al                                                                               | Yes | No | Do not know | Score | Comment                                                                                                                                                                 |
|----------------------------------------------------------------------------------------------------------------|-----|----|-------------|-------|-------------------------------------------------------------------------------------------------------------------------------------------------------------------------|
| 1. Are there previous conclusive reports on this reaction?                                                     | +1  | 0  | 0           | 1     | ≥2 published reports in which the adverse reaction has been described in detail<br>Adverse reaction appeared soon after vaccination<br>Resolution with immunomodulators |
| 2. Did the adverse event appear after the suspected drug was administered?                                     | +2  | -1 | 0           | 2     |                                                                                                                                                                         |
| 3. Did the adverse reaction improve when the drug was discontinued, or a specific antagonist was administered? | +1  | 0  | 0           | 1     |                                                                                                                                                                         |
| 4. Did the adverse reaction reappear when the drug was readministered?                                         | +2  | -1 | 0           | 0     | No known agent or condition that could lead to AIH                                                                                                                      |
| 5. Are there alternative causes (other than the drug) that could on their own have caused the reaction?        | -1  | +2 | 0           | 2     |                                                                                                                                                                         |
| 6. Did the reaction appeared when a placebo was given?                                                         | -1  | +1 | 0           | 0     |                                                                                                                                                                         |
| 7. Was the drug detected in the blood (or other body fluids) in concentrations known to be toxic?              | +1  | 0  | 0           | 0     | Biopsy compatible with AIH                                                                                                                                              |
| 8. Was the reaction more severe when the dose was increased, or less severe when dose decreased?               | +1  | 0  | 0           | 0     |                                                                                                                                                                         |
| 9. Did the patient have a similar reaction to the same or similar drugs in any previous exposure?              | +1  | 0  | 0           | 0     |                                                                                                                                                                         |
| 10. Was the adverse event confirmed by any objective evidence?                                                 | +1  | 0  | 0           | 1     |                                                                                                                                                                         |
| Total score: 7 → Probable adverse drug reaction                                                                |     |    |             |       |                                                                                                                                                                         |

| Case 45 by: <b>Mathew et al</b>                                                                                | Yes | No | Do not know | Score | Comment                                                                                                                                                                 |
|----------------------------------------------------------------------------------------------------------------|-----|----|-------------|-------|-------------------------------------------------------------------------------------------------------------------------------------------------------------------------|
| 1. Are there previous conclusive reports on this reaction?                                                     | +1  | 0  | 0           | 1     | ≥2 published reports in which the adverse reaction has been described in detail<br>Adverse reaction appeared soon after vaccination<br>Resolution with immunomodulators |
| 2. Did the adverse event appear after the suspected drug was administered?                                     | +2  | -1 | 0           | 2     |                                                                                                                                                                         |
| 3. Did the adverse reaction improve when the drug was discontinued, or a specific antagonist was administered? | +1  | 0  | 0           | 1     |                                                                                                                                                                         |
| 4. Did the adverse reaction reappear when the drug was readministered?                                         | +2  | -1 | 0           | 0     | Chronic use of analgetics. Possible drug toxicity is described also in liver histopathological findings.                                                                |
| 5. Are there alternative causes (other than the drug) that could on their own have caused the reaction?        | -1  | +2 | 0           | -1    |                                                                                                                                                                         |
| 6. Did the reaction appeared when a placebo was given?                                                         | -1  | +1 | 0           | 0     |                                                                                                                                                                         |
| 7. Was the drug detected in the blood (or other body fluids) in concentrations known to be toxic?              | +1  | 0  | 0           | 0     | Biopsy compatible with AIH                                                                                                                                              |
| 8. Was the reaction more severe when the dose was increased, or less severe when dose decreased?               | +1  | 0  | 0           | 0     |                                                                                                                                                                         |
| 9. Did the patient have a similar reaction to the same or similar drugs in any previous exposure?              | +1  | 0  | 0           | 0     |                                                                                                                                                                         |
| 10. Was the adverse event confirmed by any objective evidence?                                                 | +1  | 0  | 0           | 1     |                                                                                                                                                                         |
| Total score: 4 → Possible adverse drug reaction                                                                |     |    |             |       |                                                                                                                                                                         |

| Case 46 by: <b>Ferronato et al</b>                                                                             | Yes | No | Do not know | Score | Comment                                                                                                                                                       |
|----------------------------------------------------------------------------------------------------------------|-----|----|-------------|-------|---------------------------------------------------------------------------------------------------------------------------------------------------------------|
| 1. Are there previous conclusive reports on this reaction?                                                     | +1  | 0  | 0           | 1     | ≥2 published reports in which the adverse reaction has been described in detail<br>Adverse reaction appeared soon after vaccination<br>Spontaneous resolution |
| 2. Did the adverse event appear after the suspected drug was administered?                                     | +2  | -1 | 0           | 2     |                                                                                                                                                               |
| 3. Did the adverse reaction improve when the drug was discontinued, or a specific antagonist was administered? | +1  | 0  | 0           | 0     |                                                                                                                                                               |
| 4. Did the adverse reaction reappear when the drug was readministered?                                         | +2  | -1 | 0           | 0     | No known agent or condition that could lead to AIH                                                                                                            |
| 5. Are there alternative causes (other than the drug) that could on their own have caused the reaction?        | -1  | +2 | 0           | 2     |                                                                                                                                                               |
| 6. Did the reaction appear when a placebo was given?                                                           | -1  | +1 | 0           | 0     |                                                                                                                                                               |
| 7. Was the drug detected in the blood (or other body fluids) in concentrations known to be toxic?              | +1  | 0  | 0           | 0     | Biopsy compatible with AIH                                                                                                                                    |
| 8. Was the reaction more severe when the dose was increased, or less severe when dose decreased?               | +1  | 0  | 0           | 0     |                                                                                                                                                               |
| 9. Did the patient have a similar reaction to the same or similar drugs in any previous exposure?              | +1  | 0  | 0           | 0     |                                                                                                                                                               |
| 10. Was the adverse event confirmed by any objective evidence?                                                 | +1  | 0  | 0           | 1     |                                                                                                                                                               |
| Total score: 6 → Probable adverse drug reaction                                                                |     |    |             |       |                                                                                                                                                               |

| Case 47 by: <b>Ferronato et al</b>                                                                             | Yes | No | Do not know | Score | Comment                                                                                                                                                                                    |
|----------------------------------------------------------------------------------------------------------------|-----|----|-------------|-------|--------------------------------------------------------------------------------------------------------------------------------------------------------------------------------------------|
| 1. Are there previous conclusive reports on this reaction?                                                     | +1  | 0  | 0           | 1     | ≥2 published reports in which the adverse reaction has been described in detail<br>Adverse reaction appeared soon after vaccination<br>Patient declined corticosteroids. Symptoms persist. |
| 2. Did the adverse event appear after the suspected drug was administered?                                     | +2  | -1 | 0           | 2     |                                                                                                                                                                                            |
| 3. Did the adverse reaction improve when the drug was discontinued, or a specific antagonist was administered? | +1  | 0  | 0           | 0     |                                                                                                                                                                                            |
| 4. Did the adverse reaction reappear when the drug was readministered?                                         | +2  | -1 | 0           | 0     | No known agent or condition that could lead to AIH                                                                                                                                         |
| 5. Are there alternative causes (other than the drug) that could on their own have caused the reaction?        | -1  | +2 | 0           | 2     |                                                                                                                                                                                            |
| 6. Did the reaction appear when a placebo was given?                                                           | -1  | +1 | 0           | 0     |                                                                                                                                                                                            |
| 7. Was the drug detected in the blood (or other body fluids) in concentrations known to be toxic?              | +1  | 0  | 0           | 0     | Biopsy compatible with AIH                                                                                                                                                                 |
| 8. Was the reaction more severe when the dose was increased, or less severe when dose decreased?               | +1  | 0  | 0           | 0     |                                                                                                                                                                                            |
| 9. Did the patient have a similar reaction to the same or similar drugs in any previous exposure?              | +1  | 0  | 0           | 0     |                                                                                                                                                                                            |
| 10. Was the adverse event confirmed by any objective evidence?                                                 | +1  | 0  | 0           | 1     |                                                                                                                                                                                            |
| Total score: 6 → Probable adverse drug reaction                                                                |     |    |             |       |                                                                                                                                                                                            |

| Case 48 by: <b>Ferronato et al</b>                                                                             | Yes | No | Do not know | Score | Comment                                                                                                                                                                                 |
|----------------------------------------------------------------------------------------------------------------|-----|----|-------------|-------|-----------------------------------------------------------------------------------------------------------------------------------------------------------------------------------------|
| 1. Are there previous conclusive reports on this reaction?                                                     | +1  | 0  | 0           | 1     | ≥2 published reports in which the adverse reaction has been described in detail<br>Flare of transaminases elevation appeared soon after vaccination<br>Resolution with corticosteroids. |
| 2. Did the adverse event appear after the suspected drug was administered?                                     | +2  | -1 | 0           | 2     |                                                                                                                                                                                         |
| 3. Did the adverse reaction improve when the drug was discontinued, or a specific antagonist was administered? | +1  | 0  | 0           | 1     |                                                                                                                                                                                         |
| 4. Did the adverse reaction reappear when the drug was readministered?                                         | +2  | -1 | 0           | 0     | Known AIH, but symptoms flare with vaccination                                                                                                                                          |
| 5. Are there alternative causes (other than the drug) that could on their own have caused the reaction?        | -1  | +2 | 0           | 2     |                                                                                                                                                                                         |
| 6. Did the reaction appear when a placebo was given?                                                           | -1  | +1 | 0           | 0     |                                                                                                                                                                                         |
| 7. Was the drug detected in the blood (or other body fluids) in concentrations known to be toxic?              | +1  | 0  | 0           | 0     | Flare was more severe after 2 <sup>nd</sup> vaccine dose                                                                                                                                |
| 8. Was the reaction more severe when the dose was increased, or less severe when dose decreased?               | +1  | 0  | 0           | 1     |                                                                                                                                                                                         |
| 9. Did the patient have a similar reaction to the same or similar drugs in any previous exposure?              | +1  | 0  | 0           | 0     |                                                                                                                                                                                         |
| 10. Was the adverse event confirmed by any objective evidence?                                                 | +1  | 0  | 0           | 1     | Biopsy compatible with AIH                                                                                                                                                              |
| Total score: 8 → Probable adverse drug reaction                                                                |     |    |             |       |                                                                                                                                                                                         |

| Case 49 by: <b>Romero-Salazar et al</b>                                                                        | Yes | No | Do not know | Score | Comment                                                                                                                                                                 |
|----------------------------------------------------------------------------------------------------------------|-----|----|-------------|-------|-------------------------------------------------------------------------------------------------------------------------------------------------------------------------|
| 1. Are there previous conclusive reports on this reaction?                                                     | +1  | 0  | 0           | 1     | ≥2 published reports in which the adverse reaction has been described in detail<br>Adverse reaction appeared soon after vaccination<br>Resolution with corticosteroids. |
| 2. Did the adverse event appear after the suspected drug was administered?                                     | +2  | -1 | 0           | 2     |                                                                                                                                                                         |
| 3. Did the adverse reaction improve when the drug was discontinued, or a specific antagonist was administered? | +1  | 0  | 0           | 1     |                                                                                                                                                                         |
| 4. Did the adverse reaction reappear when the drug was readministered?                                         | +2  | -1 | 0           | 0     | Patient with PBC, but liver biopsy was typical for AIH                                                                                                                  |
| 5. Are there alternative causes (other than the drug) that could on their own have caused the reaction?        | -1  | +2 | 0           | 2     |                                                                                                                                                                         |
| 6. Did the reaction appear when a placebo was given?                                                           | -1  | +1 | 0           | 0     |                                                                                                                                                                         |
| 7. Was the drug detected in the blood (or other body fluids) in concentrations known to be toxic?              | +1  | 0  | 0           | 0     | Biopsy compatible with AIH                                                                                                                                              |
| 8. Was the reaction more severe when the dose was increased, or less severe when dose decreased?               | +1  | 0  | 0           | 0     |                                                                                                                                                                         |
| 9. Did the patient have a similar reaction to the same or similar drugs in any previous exposure?              | +1  | 0  | 0           | 0     |                                                                                                                                                                         |
| 10. Was the adverse event confirmed by any objective evidence?                                                 | +1  | 0  | 0           | 1     |                                                                                                                                                                         |

| Case 50 by: <b>Mahalingham et al</b>                                                                           | Yes | No | Do not know | Score | Comment                                                                                                                                                                   |
|----------------------------------------------------------------------------------------------------------------|-----|----|-------------|-------|---------------------------------------------------------------------------------------------------------------------------------------------------------------------------|
| 1. Are there previous conclusive reports on this reaction?                                                     | +1  | 0  | 0           | 1     | ≥2 published reports in which the adverse reaction has been described in detail<br>Adverse reaction appeared soon after vaccination<br>Resolution with immunosuppression. |
| 2. Did the adverse event appear after the suspected drug was administered?                                     | +2  | -1 | 0           | 2     |                                                                                                                                                                           |
| 3. Did the adverse reaction improve when the drug was discontinued, or a specific antagonist was administered? | +1  | 0  | 0           | 1     |                                                                                                                                                                           |
| 4. Did the adverse reaction reappear when the drug was readministered?                                         | +2  | -1 | 0           | 0     |                                                                                                                                                                           |
| 5. Are there alternative causes (other than the drug) that could on their own have caused the reaction?        | -1  | +2 | 0           | 2     |                                                                                                                                                                           |
| 6. Did the reaction appeared when a placebo was given?                                                         | -1  | +1 | 0           | 0     | Patient with liver transplantation due to AIH, but no evidence of active disease before vaccination.                                                                      |
| 7. Was the drug detected in the blood (or other body fluids) in concentrations known to be toxic?              | +1  | 0  | 0           | 0     |                                                                                                                                                                           |
| 8. Was the reaction more severe when the dose was increased, or less severe when dose decreased?               | +1  | 0  | 0           | 0     |                                                                                                                                                                           |
| 9. Did the patient have a similar reaction to the same or similar drugs in any previous exposure?              | +1  | 0  | 0           | 0     |                                                                                                                                                                           |
| 10. Was the adverse event confirmed by any objective evidence?                                                 | +1  | 0  | 0           | 1     |                                                                                                                                                                           |
| Total score: <b>7</b> → Probable adverse drug reaction                                                         |     |    |             |       |                                                                                                                                                                           |

| Case 51 by: <i>Lee et al</i>                                                                                   | Yes | No | Do not know | Score | Comment                                                                                                                                                                              |
|----------------------------------------------------------------------------------------------------------------|-----|----|-------------|-------|--------------------------------------------------------------------------------------------------------------------------------------------------------------------------------------|
| 1. Are there previous conclusive reports on this reaction?                                                     | +1  | 0  | 0           | 1     | ≥2 published reports in which the adverse reaction has been described in detail<br>Adverse reaction appeared soon after vaccination<br>Resolution without need for immunomodulation. |
| 2. Did the adverse event appear after the suspected drug was administered?                                     | +2  | -1 | 0           | 2     |                                                                                                                                                                                      |
| 3. Did the adverse reaction improve when the drug was discontinued, or a specific antagonist was administered? | +1  | 0  | 0           | 0     |                                                                                                                                                                                      |
| 4. Did the adverse reaction reappear when the drug was readministered?                                         | +2  | -1 | 0           | 0     |                                                                                                                                                                                      |
| 5. Are there alternative causes (other than the drug) that could on their own have caused the reaction?        | -1  | +2 | 0           | 2     |                                                                                                                                                                                      |
| 6. Did the reaction appeared when a placebo was given?                                                         | -1  | +1 | 0           | 0     | No known agent or condition that could lead to AIH                                                                                                                                   |
| 7. Was the drug detected in the blood (or other body fluids) in concentrations known to be toxic?              | +1  | 0  | 0           | 0     |                                                                                                                                                                                      |
| 8. Was the reaction more severe when the dose was increased, or less severe when dose decreased?               | +1  | 0  | 0           | 0     |                                                                                                                                                                                      |
| 9. Did the patient have a similar reaction to the same or similar drugs in any previous exposure?              | +1  | 0  | 0           | 0     |                                                                                                                                                                                      |
| 10. Was the adverse event confirmed by any objective evidence?                                                 | +1  | 0  | 0           | 1     |                                                                                                                                                                                      |
| Total score: 6 → Probable adverse drug reaction                                                                |     |    |             |       |                                                                                                                                                                                      |
